# Preconditioning and Postinsult Therapies for Perinatal Hypoxic–Ischemic Injury at Term

Robert D. Sanders, B.Sc., M.B.B.S., F.R.C.A.,\* Helen J. Manning, M.B., D.F.F.P., M.R.C.O.G.,† Nicola J. Robertson, M.B.Ch.B., Ph.D., F.R.C.P.C.H.,‡ Daqing Ma, M.D., Ph.D.,§ A. David Edwards, M.B.Ch.B., F.R.C.P.C.H., F.Med.Sci.,|| Henrik Hagberg, M.D., Ph.D.,# Mervyn Maze, M.B.Ch.B., F.R.C.P., F.R.C.A., F.Med.Sci.\*\*

## ABSTRACT

Perinatal hypoxic–ischemic encephalopathy can be a devastating complication of childbirth. Herein, the authors review the pathophysiology of hypoxic–ischemic encephalopathy and the current status of neuroprotective strategies to ameliorate the

injury centering on four themes: (1) monitoring in the perinatal period, (2) rapid identification of affected neonates to allow timely institution of therapy, (3) preconditioning therapy (a therapeutic that reduces the brain vulnerability) before hypoxic–ischemic encephalopathy, and (4) prompt institution of post-insult therapies to ameliorate the evolving injury. Recent clinical trials have demonstrated the significant benefit for hypothermic therapy in the postnatal period; furthermore, there is accumulating preclinical evidence that adjunctive therapies can enhance hypothermic neuroprotection. Advances in the understanding of preconditioning may lead to the administration of neuroprotective agents earlier during childbirth. Although most of these neuroprotective strategies have not yet entered clinical practice, there is a significant hope that further developments will enhance hypothermic neuroprotection.

\* Medical Research Council Clinical Training Fellow, Departments of Anaesthetics, Intensive Care and Pain Medicine, and Leucocyte Biology, § Senior Lecturer, Department of Anaesthetics, Intensive Care and Pain Medicine, || Professor and Head of Neonatal Medicine, Medical Research Council Clinical Sciences Centre, # Professor, Department of Obstetrics & Gynaecology, Institute of Reproductive and Developmental Biology, Queen Charlotte's & Chelsea Hospital, Imperial College London, London, United Kingdom. † Specialty Trainee, Department of Obstetrics and Gynaecology, John Radcliffe Hospital, Oxford, United Kingdom. ‡ Reader, University College London Institute for Women's Health, University College Hospital London, London, United Kingdom. \*\* Sir Ivan Magill Professor and Head of Department, Department of Anaesthetics, Intensive Care and Pain Medicine, Imperial College London. Current position: Professor and Chair, Department of Anesthesia and Perioperative Care, University College San Francisco, San Francisco, California.

Received from the Department of Anaesthetics, Intensive Care and Pain Medicine, Imperial College London, London, United Kingdom, and Magill Department of Anaesthetics, Pain and Intensive Care Medicine, Chelsea & Westminster Hospital, London, United Kingdom. Submitted for publication November 6, 2009. Accepted for publication February 17, 2010. Supported was provided from departmental resources and also by the Medical Research Council and the Association of Anaesthetists of Great Britain and Ireland, British Journal of Anaesthesia/Royal College of Anaesthetists, London, United Kingdom (to Dr. Sanders, Dr. Ma, and Prof. Maze); Action Medical Research, Horsham, United Kingdom, and the European Society of Anaesthesiologists, Brussels, Belgium (to Dr. Ma); Medical Research Council strategic award, London, United Kingdom, European Union, Brussels, Belgium, and the Swedish Research Council, Stockholm, Sweden (to Prof. Hagberg); Medical Research Council (to Dr. Robertson and Prof. Edwards); Wellbeing of Women and the Comprehensive Biomedical Research Centre, London, United Kingdom (to Dr. Robertson); and Engineering and Physical Sciences Research Council, Swindon, United Kingdom, Action Medical Research, and the Garfield Weston Foundation, London, United Kingdom (to Prof. Edwards). Dr. Maze has received consultancy fees and/or funding from Air Products, Allentown, Pennsylvania, and Air Liquide Sante International, Paris, France, concerning the development of clinical applications for medical gases, including xenon. Dr. Maze discovered and patented the anesthetic properties of dexmedetomidine in 1987, and he reverted his rights to the patent to Orion Farnos for \$250,000 in support of laboratory activities. Dr. Maze has received grant support, speakers fees, and honoraria from Orion (Espoo, Finland), Abbott Labs (Abbott

**M**ODERATE to severe hypoxic–ischemic encephalopathy (HIE) occurs at a rate of approximately 1–2 per 1,000 full-term live births,<sup>1,2</sup> with a total HIE incidence of three to five cases per 1,000 full-term live births.<sup>3</sup> The incidence is up to 10-fold higher in developing countries and globally, 23% of the 4 million annual neonatal deaths are attributed to birth asphyxia.<sup>4</sup> Perinatal asphyxia is believed to account for 10–20% of cases of cerebral palsy in term infants; however, certain subtypes of cerebral palsy such as dyskinetic cerebral palsy may have a higher incidence (up to 80%) of HIE etiology.<sup>5</sup> Neonates with a moderate HIE have a 10% risk of death and a 30% risk of disabilities with more subtle cognitive impairments potentially occurring with even greater frequency.<sup>6</sup>

Neuroprotective strategies to combat HIE are urgently required; these could include (1) improved monitoring in the perinatal period, (2) rapid identification of affected neonates to allow timely institution of therapy, (3) preconditioning therapy (a therapeutic that reduces the brain vulnerability) before HIE, and (4) prompt institution of postinsult therapies to ameliorate the evolving injury. This review will cover developments in these four themes of the neuroprotective strategy, focusing on potential interventions of the future following discussion of the pathogenesis of HIE.

## Pathogenesis of Perinatal Hypoxic–Ischemic Neuronal Injury

In the nonpathogenic state, the central nervous system has a relatively high requirement for oxygen and glucose that is mostly metabolized by oxidative phosphorylation. In HIE, injury occurs to the areas of the human brain with a high metabolic rate and blood flow and a large number of excitatory glutamatergic neuronal synapses.<sup>5</sup> A rapid reduction in oxidative phosphorylation induces a primary energy failure in these neurons with subsequent neurotoxicity. The pattern of brain injury depends on both the gestational age of the infant and the intensity and duration of the hypoxia–ischemia (acute near total hypoxia–ischemia or chronic partial). With the help of magnetic resonance imaging studies in term infants with HIE, two main patterns have been described—basal ganglia/thalamus predominant (typically infants with an acute profound episode of hypoxia–ischemia who require significant resuscitation at birth) and watershed predominant pattern (typically infants with more prolonged partial hypoxia–ischemia who are less depressed at birth), although a mixed or atypical pattern may also occur.<sup>7</sup> A significant problem with developing generalized therapies is that the injury can vary significantly between afflicted individuals. Consistently, however, studies in term infants with perinatal asphyxia<sup>8</sup> and animals<sup>9</sup> employing magnetic resonance spectroscopy have defined a biphasic pattern of energy failure during and after a period of hypoxia–ischemia (fig. 1).

## Primary Energy Failure and Excitotoxicity in Hypoxic–Ischemic Encephalopathy

Impaired neuronal energetics, secondary to hypoxia–ischemia, results in the dysregulation of ionic gradients in the brain. Energy depletion results in dysfunction of adenosine triphosphate-dependent ion channels and ion exchangers leading to cellular depolarization and the release of excitatory neurotransmitters such as glutamate (fig. 2).<sup>10</sup> Excess glutamatergic neurotransmission induces excitotoxic cell death (neuronal overexcitation leading to a cellular death); extracellular concentrations of glutamate can rise up to 10-fold. This excitotoxic injury is compounded by the failure of energy-dependent glutamate uptake mechanisms, which may even reverse, thereby exacerbating the excitatory load. Activation of postsynaptic glutamate receptors such as  $\alpha$ -amino-3-hydroxy-5-methylisoxazole-4-propionic acid receptors

and *N*-methyl-D-aspartate (NMDA) receptors mediates this injury, producing a transmembrane flux of sodium and calcium cations. NMDA receptors are abundant in early life (because of their role in the brain development, cell differentiation, axonal growth, and cell pruning)<sup>11</sup> meaning the immature brain is particularly vulnerable to excitotoxic injury.<sup>12</sup> In particular, the NR2B subunit containing NMDA receptors is prevalent,<sup>11</sup> and this may be important as NMDA receptors containing NR1/NR2B decay three to four times more slowly than NR1/NR2A receptors<sup>13</sup> and thus invoke greater cation movement.

Water passively follows the transmembrane flux of sodium and chloride, causing neuronal swelling and cerebral edema. The rise in intracellular calcium initiates a series of cytoplasmic and nuclear events that promote tissue damage. For example, overactivation of enzyme systems, such as proteases, lipases, and endonucleases, degrades cytoskeletal proteins and generates free radicals that damage the membranes, mitochondria, and DNA with ensuing cell death.<sup>14</sup> Understanding the pathogenesis of excitotoxicity has stimulated interest in NMDA antagonists as postinsult neuroprotectants. An alternate approach is to increase the inhibitory tone in the brain by activation of  $\alpha_2$  adrenoceptors. In adults, the  $\gamma$ -aminobutyric acid type A channels are powerful inhibitory receptors that may have a role in neuroprotection; however, in the immature brain, these channels are excitatory rather than inhibitory.<sup>15</sup> This occurs because the neuronal chloride importer NKCC1 is overexpressed on immature neurons, resulting in high intracellular chloride ion concentrations leading to chloride efflux with receptor activation. Therefore, it is unclear whether  $\gamma$ -aminobutyric acid type A channels agonists will prove useful neuroprotective agents for HIE, although NKCC1 inhibitors are being examined for this purpose (see Postinsult Therapies, Pharmacological Neuroprotection, and Antiepileptic Therapies).

## Oxidative Injury in Hypoxic–Ischemic Encephalopathy

The neonatal brain seems particularly vulnerable to oxidative injury<sup>14</sup> because of immature scavenging mechanisms and a relative abundance of iron that acts as a catalyst for the formation of free radicals. Reactive oxygen and nitrogen species are produced that damage proteins, initiate mitochondrial stress, opening of the mitochondrial transition pore, and activate apoptotic pathways *via* release of mitochondrial proteins. Indeed, mitochondrial swelling and excess calcium are common after reperfusion in HIE models<sup>16</sup>; these changes are improved by the administration of NMDA antagonists.<sup>17</sup> NMDA receptor activation drives the production of nitric oxide through neuronal nitric oxide synthase (although inducible nitric oxide synthase is also constitutively expressed in the postnatal period).<sup>14</sup> Another free radical, superoxide, is produced predominantly by mitochondrial stress. Excess nitric oxide may also play a role in the production of superoxide by inhibiting electron transport chain function. Sub-

Park, Illinois)—who registered dexmedetomidine for its sedative use, and Hospira Inc. (Lake Forest, Illinois) (who markets dexmedetomidine). Dr Sanders has received consultancy fees from Air Liquide Sante International concerning the development of clinical applications for xenon.

Address correspondence to Dr. Sanders: Department of Anaesthetics, Intensive Care and Pain Medicine, Imperial College London, and Magill Department of Anaesthetics, Pain and Intensive Care Medicine, Chelsea & Westminster Hospital, Fulham Road, London SW10 9NH, United Kingdom. robert.sanders@imperial.ac.uk. This article may be accessed for personal use at no charge through the Journal Web site, [www.anesthesiology.org](http://www.anesthesiology.org).

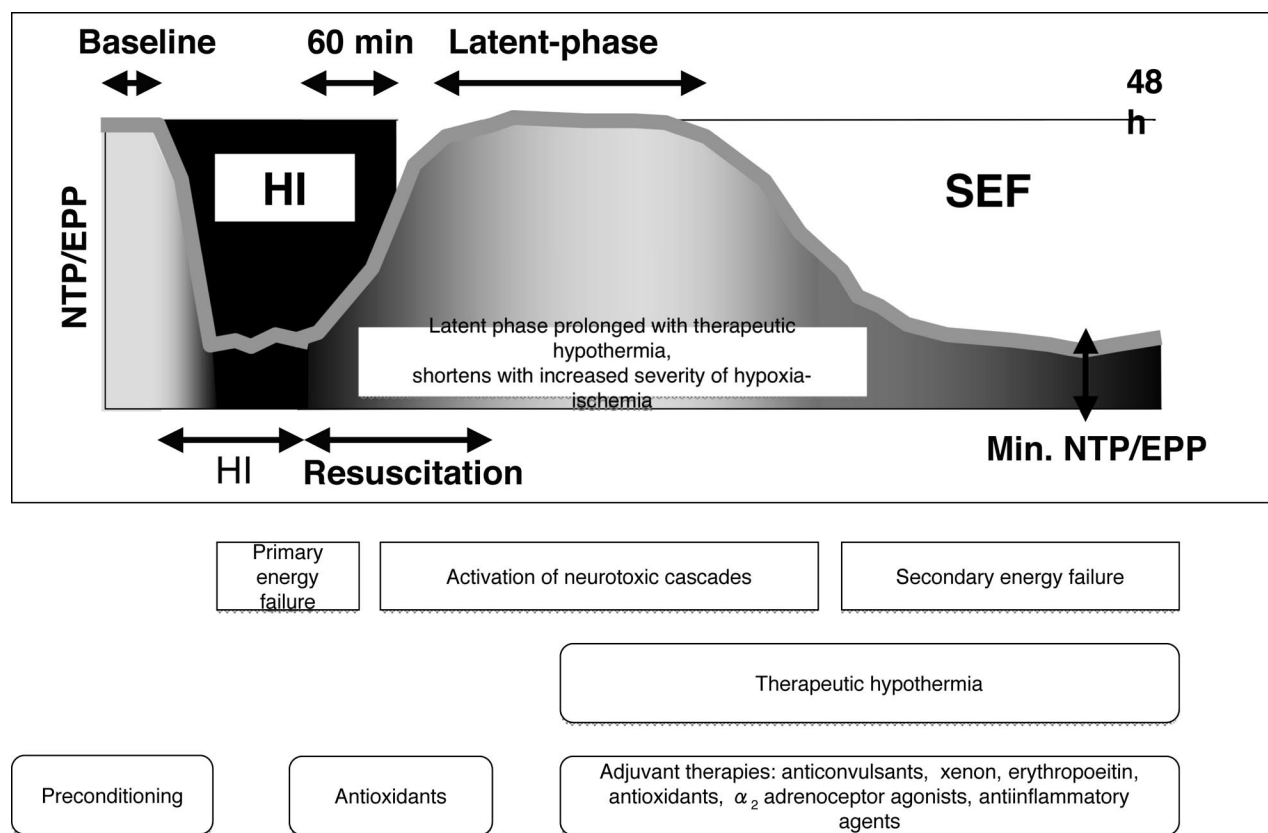

**Fig. 1.** Schematic diagram illustrating the biphasic pattern of energy failure associated with a transient hypoxic-ischemic (HI) insult visualized using phosphorus 31 magnetic resonance spectroscopy in the piglet model. The nucleotide triphosphate (NTP) concentration relative to the total high-energy exchangeable phosphate pool (EPP;  $EPP = Pi + PCr + NTP$ ) is shown on the y-axis. The change in NTP/EPP during transient HI, resuscitation, the latent phase (period between the recovery from acute HI and the evolution of secondary energy failure [SEF]) and SEF itself is shown. During the acute energy depletion, some cells undergo primary cell death, the magnitude of which will depend on the severity and duration of HI. After perfusion, the initial hypoxia-induced cytotoxic edema and accumulation of excitatory amino acids typically resolve over 30–60 min with apparent recovery of cerebral oxidative metabolism (latent phase). It is believed that the neurotoxic cascade is largely inhibited during the latent phase and that this period provides a “therapeutic window” for therapies such as hypothermia and other agents. Cerebral oxidative metabolism may then secondarily deteriorate 6–15 h later (as SEF). This phase is marked by the onset of seizures, secondary cytotoxic edema, accumulation of cytokines, and mitochondrial failure. Mitochondrial failure is a key step leading to delayed cell death.

sequent reaction of nitric oxide with superoxide produces peroxynitrite that is particularly damaging to lipid membranes and proteins. A dearth of scavenging mechanisms, including glutathione peroxidase, means there is little to oppose the generation of further free radicals.<sup>14</sup> During reperfusion, hyperoxia may then compound the formation of free radicals, further increasing oxidative stress.<sup>14,18</sup>

### Apoptotic Injury in Hypoxic-Ischemic Encephalopathy

The initial excitotoxic and oxidative injury accompanying primary energy failure is followed by a wave of programmed cell death or apoptosis (fig. 2).<sup>19,20</sup> During normal brain development, redundant neurons are deleted *via* apoptosis; this is an important physiologic process to ensure the formation of appropriate neuronal networks. However, after hypoxia-ischemia, this apoptotic component is pathologic,

leading to excessive neuronal loss. Apoptosis may occur secondary to a loss of synaptic connectivity (because of the first wave of cell death killing an innervating cell), loss of trophic factor support, inflammatory activation of death receptors, and mitochondrial impairment related to excitotoxic/oxidative stress. This process involves the mitochondrial translocation of the proapoptotic protein Bax in the immature brain (rather than opening of the mitochondrial permeability transition pore as in the adult brain<sup>21</sup>) with subsequent mitochondrial release of cytochrome *C* and activation of aspartate-specific cysteine proteases or caspases. Apoptotic neuronal injury is particularly important in the very young<sup>18,19</sup> and evolves over time, taking hours to develop. It is likely that this form of injury could be a target for novel neuroprotective regimens.

A limitation of the use of some therapeutics for HIE, particularly anesthetics and antiepileptic agents, is that they

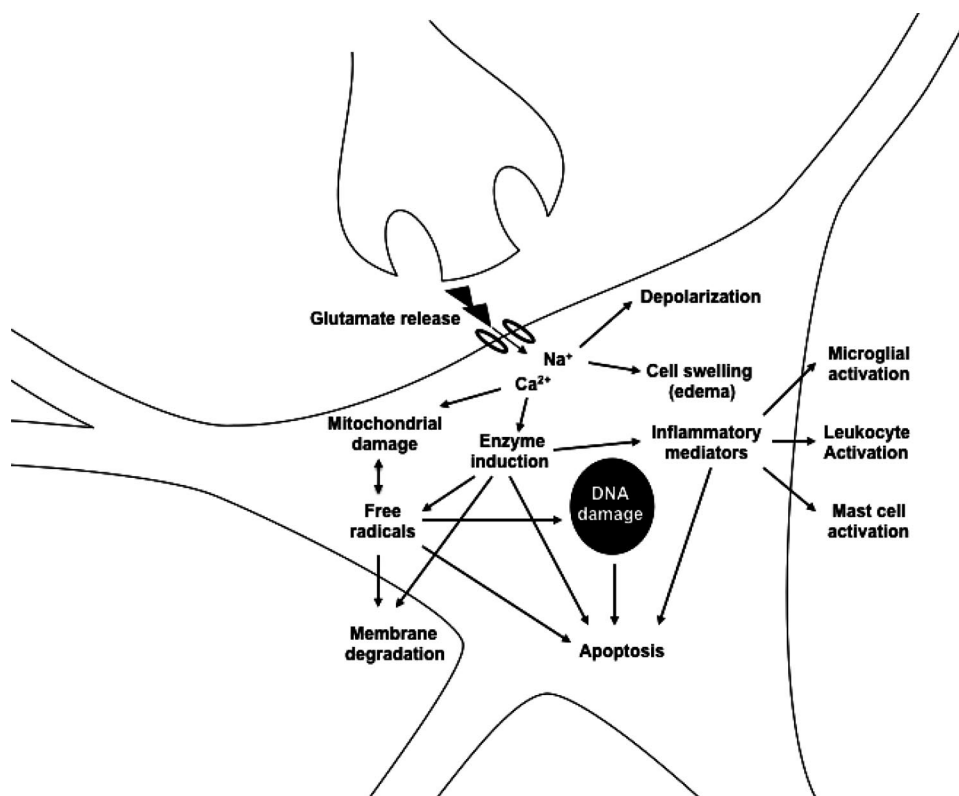

**Fig. 2.** Overview of the pathogenesis of hypoxic-ischemic brain injury. Excitotoxic brain injury after hypoxic-ischemia occurs because of overstimulation of neurons after excess glutamate release. Influx of sodium and calcium leads to cellular depolarization and swelling and activation of multiple injury cascades that lead to cell death. Critical mediators include the generation of free radicals and activation of enzymes that leads to membrane damage, inflammation, and apoptosis. Mitochondrial energy failure and calcium overload further contribute to the generation of free radicals and stimulation of apoptotic cascades through the release of cytochrome C.

themselves induce pathologic neuroapoptosis in the immature brain.<sup>22–25</sup> Indeed, we have recently discussed this “double-edged sword” of the use of anesthetics and antiepileptics for neuroprotection in the young.<sup>25</sup> However, the anesthetic (xenon) and antiepileptic (topiramate) do not induce neuroapoptotic toxicity<sup>25</sup> and provide synergistic neuroprotection with hypothermia in animal models of HIE and, thus, warrant further investigation as neuroprotectants for HIE.<sup>26,27</sup>

### Role of inflammation in Hypoxic-Ischemic Encephalopathy

Maternal intrapartum fever of greater than 38°C persisting for greater than 1 h is a clinical indicator of chorioamnionitis, and although there is a surprisingly weak correlation between clinical and histologic chorioamnionitis, there is an increasing realization that perinatal infection is linked with later brain injury.<sup>28,29</sup> Intrapartum fever increases the risk of perinatal brain injury independent of infection,<sup>30</sup> and intrapartum fever was associated with a 4-fold increase in early onset neonatal seizures at term.<sup>31</sup> Infection exacerbates hypoxia-ischemia-induced central nervous system white matter injury, cerebral palsy, and increased blood-brain barrier permeability.<sup>32</sup> Inflammatory markers in amniotic fluid in women in preterm labor or in umbilical blood at birth have been

associated with subsequent development of periventricular leukomalacia and cerebral palsy.<sup>33</sup> Animal models have shown that the administration of lipopolysaccharide (an inflammatory stimulus) before a hypoxic-ischemic insult increases subsequent neuronal injury<sup>34</sup> consistent with the view that the fetal inflammatory response seems to play a greater role than the maternal in the resultant injury.<sup>32</sup> Inflammation may contribute to increased levels of oxidative stress and apoptosis in the neonatal brain (fig. 2). However, interleukin-6 has also been reported as neuroprotective,<sup>35</sup> and thus, the consequences of the inflammatory milieu are complex. Further study of how infection and the inflammatory cascade impact on subsequent hypoxic-ischemic injury in the neonate is required.

### Secondary energy failure

A second phase of injury starts to occur within 6 h of hypoxia-ischemia, characterized by another wave of cerebral energy failure with a decrease in the phosphocreatine to inorganic phosphate ratio (fig. 1). Studies in the newborn piglet using phosphorus 31 magnetic resonance spectroscopy suggest that the duration of the latent phase (period when the cerebral energetics appear normal) shortens with increasingly severe hypoxia-ischemia.<sup>36</sup> In children, the degree of the secondary



energy failure correlates with adverse neurologic outcome assessed at 1 and 4 yr,<sup>37</sup> intracellular brain alkalosis, increased lactate to creatine ratio, and more severe neurologic outcome.<sup>38</sup> Indeed, although during birth, fetal blood samples indicating acidosis are an indicator of impaired perfusion, postnatally intraneuronal alkalosis seems a particular problem. Intracellular alkalosis may exacerbate excitotoxic injury, mitochondrial permeability, protease activation, and apoptosis potentiating the ongoing pathology. As reperfusion proceeds, further inflammation and oxidative stress occur, potentiating the ongoing injury. The use of preconditioning strategies may allow the initial injury phase (primary energy failure) to be targeted. Difficulty in preempting the first phase of injury has led to strategies to combat this second phase of injury.

It is often during this secondary phase of energy failure that clinicians typically institute supportive therapy, including hemodynamic and ventilatory support and glycemic and temperature control. The need to avoid abnormal glycemic levels and in particular hypoglycemia has been recognized for some time<sup>39</sup> and is not considered further here. The avoidance of further hypoxia is clearly important; however, so is the avoidance of hyperoxia (discussed in the Postinsult Therapies, Avoiding Hyperoxia and the use of Antioxidants and Free Radical Scavengers) and hypocapnia (discussed in the Postinsult Therapies, Avoidance of Hypocapnia). All these factors can influence cerebral autoregulation and, therefore, blood supply to, and reperfusion of, ischemic areas. However, after HIE, the limited, available clinical evidence suggests that cerebral autoregulation is impaired<sup>40,41</sup> and that the cerebral circulation becomes dependent on arterial pressure to maintain adequate perfusion. This highlights the critical role of hemodynamic support of critically ill neonates. Nonetheless, further research is required to assess the effects of HIE on cerebral autoregulation.

### Intrapartum Monitoring and the Diagnosis of Perinatal Hypoxic-Ischemic Encephalopathy

Antenatal screening identifies the risk factors that may predispose the fetus to central nervous system injury, and these include antenatally acquired infections, preeclampsia, and thyroid disease<sup>42</sup>; however, further research is required to define the relative risks for these conditions more precisely. Intrapartum the causal chain resulting in HIE is complex and far from completely understood. In a study of infants with HIE either referred or inborn at a tertiary referral center, 80% had morphologic injury consistent with an acute insult with no evidence of chronic injury or atrophy.<sup>43</sup> Certain intrapartum risk factors for HIE have been similarly identified such as maternal pyrexia and persistent occipitoposterior position.<sup>29–30</sup> Unfortunately, the contemporaneous detection of perinatal hypoxic-ischemic injury is hampered by the lack of monitors that can reliably provide the required specificity and sensitivity. The definition of perinatal asphyxia

**Table 1.** Criteria to Define an Acute Intrapartum Hypoxic Event as Sufficient to Cause Cerebral Palsy<sup>44</sup>

|   |                                                                                                                                      |
|---|--------------------------------------------------------------------------------------------------------------------------------------|
| 1 | Evidence of metabolic acidosis in fetal umbilical cord arterial blood obtained at delivery (pH <7 and base deficit $\geq 12$ mmol/l) |
| 2 | Early onset of severe or moderate neonatal encephalopathy in infants born at 34 or more weeks of gestation                           |
| 3 | Cerebral palsy of the spastic quadriplegic or dyskinetic type                                                                        |
| 4 | Exclusion of other identifiable etiologies, such as trauma, coagulation disorders, infectious conditions, or genetic disorders       |

from a recent task force at the American Academy of Pediatrics and the American College of Obstetrics and Gynecology is a clinical situation of damaging acidemia, hypoxia, and metabolic acidosis with a sentinel event capable of interrupting oxygen supply to the fetus (table 1).<sup>44</sup> Accurate identification of this sentinel event is often problematic. The desire to identify the fetus at risk has led to increased rates of cardiotocography monitoring in Western countries; for example, 85% of live births in the United States in 2002 were monitored using cardiotocography.<sup>45</sup> The cardiotocography patterns of reduced fetal heart rate variability and moderate to severe variable or late decelerations have been shown to correlate with episodes of fetal acidemia.<sup>46</sup> However, cardiotocography suffers from large intraoperator and interoperator variability, and although it is a sensitive tool, it lacks specificity. Cardiotocography only has a positive predictive value of 0.2% for the prediction of cerebral palsy<sup>47</sup> and positive predictive value of approximately 2.6% for the prediction of HIE during standard practice.<sup>48</sup> Indeed, animal research suggests that the fetal heart rate patterns during ischemia are not predictive of neurologic outcome.<sup>49</sup> Meta-analysis of 13 randomized control trials by the Cochrane group concluded that continuous cardiotocography if combined with a fetal blood sampling reduced the incidence of neonatal seizures but had no effect on the incidence of cerebral palsy or perinatal death.<sup>50</sup> It should be noted that neonatal seizures are associated with neonatal cerebral infarction,<sup>43</sup> and therefore, this does represent an important advance in predicting perinatal brain injury. Another meta-analysis demonstrated that continuous use of cardiotocography (*vs.* intermittent auscultation) was accompanied by a reduction in perinatal mortality.<sup>51</sup> Although current monitoring strategies have had an impact on perinatal outcome, the HIE incidence has not changed greatly in 50 yr, and further developments are required to improve the identification of a fetus developing HIE.

To reduce the high false-positive rates of cardiotocography, fetal blood sampling has been advocated with a fetal scalp pH of less than or equal to 7.21 and lactate greater than 4.2–4.8 mmol/l shown to enhance the detection of a compromised fetus.<sup>52</sup> Scalp lactate may be more successful than pH sampling because of the smaller volume of blood re-

quired.<sup>53</sup> However, these tests still suffer from high false-positive rates as a fetus may undergo transient episodes of asphyxia with no adverse consequences<sup>54</sup> (indeed, these episodes may prove protective as they may represent preconditioning of the fetus [explained in greater detail below in the Preconditioning section]). Recently, it has been proposed that an umbilical arterial pH less than 7.0 or a base deficit of 12 mm are appropriate levels for the risk of neonatal neurologic injury.<sup>54</sup> By using an umbilical arterial pH <7.0 to define intrapartum asphyxia, this condition was identified in 3.7 of 1,000 live-term births; 23% of these patients had abnormal neurology or died.

New fetal monitoring techniques may offer hope for the future, for example, fetal electrocardiogram ST segment monitoring and umbilical artery and middle cerebral artery Doppler velocity are examples of more recent developments.<sup>50,55,56</sup> Some support for the use of fetal ST waveform analysis as an adjunct to cardiotocography exists when a decision has been made to undertake continuous electronic fetal heart rate monitoring during labor. Fetal pulse oximetry monitoring in conjunction with cardiotocography has also been investigated but did not reduce the overall cesarean section rate, and thus, its further use has not yet been endorsed by the American College of Obstetrics and Gynecology.<sup>45</sup> Whether these monitors will obtain the evidence base required to change practice remains to be seen. At present, we lack a clinical tool to inform accurately when the fetus enters the decompensatory phase and needs to be delivered and/or should receive neuroprotective treatment.

## Postpartum Assessment and the Diagnosis of Perinatal Hypoxic-Ischemic Encephalopathy

Rapid clinical assessment of the neonate that complements the information obtained from obstetric review is required to ensure prompt diagnosis and hence the initiation of optimal treatment. However, encephalopathy represents a syndrome with multiple possible presenting symptoms and signs,<sup>1</sup> and hypoxia-ischemia is not the only cause (other causes include trauma, infection, coagulopathies, and genetic disorders). The presence of acidosis (pH <7.0), Apgar 0 to 3 after 5 min, neurologic dysfunction, and multisystem dysfunction<sup>57,58</sup> are required for the term asphyxia. Because intrapartum hypoxia-ischemia is an evolving illness with worsening clinical signs after the first 12–24 h and a slow improvement after 4–5 days, encephalopathy scores usually peak on day 3–4. Most encephalopathy scores are based on the clinical criteria developed by Sarnat and Sarnat.<sup>59</sup> Recent modifications have been directed at developing quantifiable scores with good reproducibility.<sup>1</sup> Amplitude integrated electroencephalogram has been used as supporting evidence to aid enrollment into clinical trials for hypothermic neuroprotection because it has a positive predictive value of approximately 80% when used in infants with the clinical diagnosis.<sup>60–62</sup> The background activity on the amplitude

integrated electroencephalogram is predictive of outcome as early as 3 and 6 h after birth in HIE.<sup>62,63</sup> Unfortunately, although there has been interest in the development of biomarkers of injury, in particular magnetic resonance biomarkers,<sup>64</sup> logistical factors currently preclude the use of this technology in the hours after birth to improve early assessment of the affected neonate.<sup>65</sup>

## Preconditioning

There is a growing interest in harnessing endogenous neuroprotective mechanisms to optimize neuroprotection. Hypoxic preconditioning is a phenomenon in which brief non-lethal episodes of hypoxia confer protection against a subsequent sustained period of lethal hypoxia-ischemia. The ability of transient hypoxic episodes to prepare a fetus for a more severe neurologic insult in the peripartum period is of particular interest.<sup>66</sup> In an animal model, hypoxic preconditioning is induced by exposure to 8% oxygen for 3 h followed by a pathologic hypoxic-ischemic insult 24 h later; in this setting, long-term neuroprotection (up to 80% protection 8 weeks later), antiapoptotic effect, and improved functional recovery occur.<sup>66</sup> These findings have also been demonstrated with *in utero* ischemia of the fetus.<sup>67</sup> Hypoxia inducible factor is upregulated by this form of preconditioning leading to the downstream expression of neuroprotective factors such as erythropoietin and vascular endothelial growth factor that combat oxidative stress, excitotoxicity, inflammation, and apoptosis and inducing increased vascular density in the brain (fig. 3).<sup>68</sup> Hypoxic preconditioning upregulates endogenous antioxidant and antiapoptotic defense mechanisms<sup>69</sup> and increases glycogen stores that aids the preservation of high energy phosphate stores during the subsequent insult.<sup>70</sup> As the mechanisms of hypoxic preconditioning are further unraveled (fig. 3), it is anticipated that pharmacologic agents can be developed to activate these cellular defense mechanisms to mimic hypoxic preconditioning. Indeed, possible targets include activators of adenosine or adenosine triphosphate-dependent potassium channels and alternate cell survival signaling pathways (fig. 3). An advantage of the use of preconditioning strategies to potentiate endogenous neuroprotective mechanisms before the insult is that they would not be reliant on rapid identification of those affected by HIE. Instead, provided an adequate safety profile is established, preconditioning agents could be administered to high-risk laboring women. Possible preconditioning agents that may activate similar pathways to hypoxia include desferrioxamine<sup>71</sup> or certain anesthetic agents.<sup>72–74</sup>

We tested whether the anesthetic gases, nitrous oxide, and xenon could precondition in a neonatal rat model of HIE. Both drugs block the NMDA receptor, and as NMDA antagonists can precondition *in vitro*, we sought to understand their effects *in vivo*.<sup>72</sup> Xenon reduced the neonatal brain injury and improved the animal neurology, whereas nitrous oxide lacked effect.<sup>72</sup> We have recently shown that xenon upregulates hypoxia-inducible factor activity and the pro-

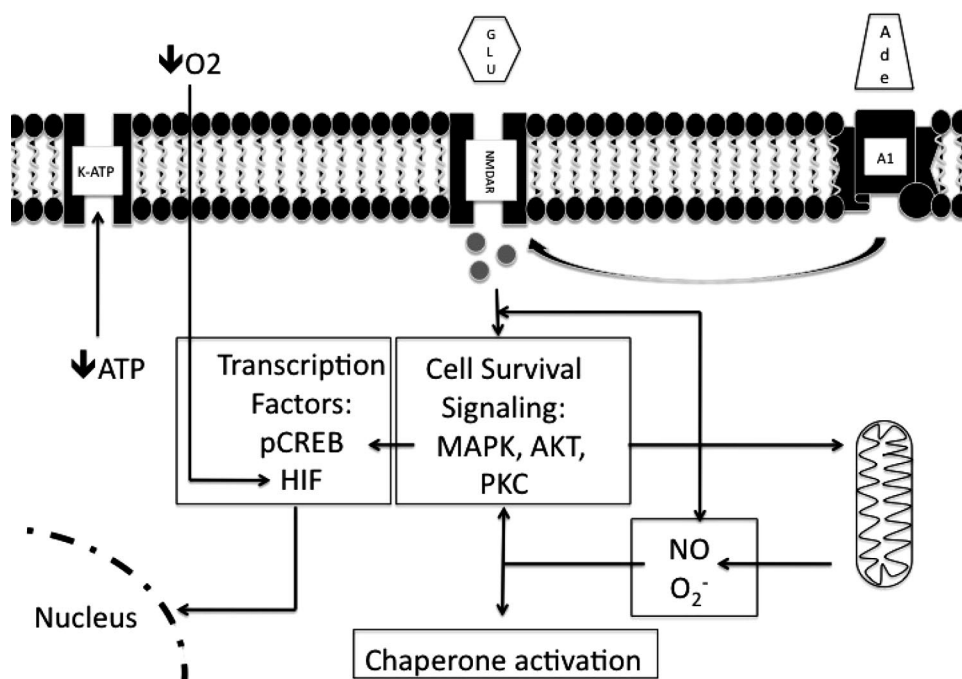

**Fig. 3.** Overview of the putative cellular targets of neuronal hypoxic preconditioning. Hypoxic preconditioning likely involves subinjurious stimulation occurring through pathways involved with hypoxic injury (fig. 2). The exact mechanisms of neuronal hypoxic preconditioning are slowly being unraveled; however, some of the known mediators are shown in the schematic mentioned earlier. Important receptor targets likely include ionotropic *N*-methyl-D-aspartate (NMDAR) glutamate (glu) receptors and adenosine triphosphate-dependent potassium channels (K-ATP) and G-protein-coupled adenosine (A1) receptors. Adenosine (A1) receptors (stimulated by adenosine [Ade]) likely act by reducing cellular activity during the subsequent insult. The downstream effectors distal to K-ATP signaling are unknown. Stimulation of excitatory receptors, exemplified by NMDA receptors, triggers the activation of cascades involved with cell survival and also produces reactive oxygen species (nitric oxide [NO] and superoxide [O<sub>2</sub><sup>-</sup>]). The cell survival cascades include protein kinases such as mitogen-activated protein kinases (MAPK), protein kinase B (AKT), and protein kinase C (PKC; notably protein kinase C $\epsilon$ ). The protein kinases can activate important transcription factors including phosphorylated cyclic-adenosine monophosphate response element-binding protein (pCREB). Hypoxia can also directly activate the hypoxia-inducible factor (HIF) by preventing HIF degradation allowing it to act as a transcription factor to upregulate effectors such as erythropoietin and vascular endothelial growth factor. Finally, the activation of protein chaperones, including the heat shock proteins enhances protein stability and resists protein damage. This schematic does not portray all the targets of hypoxic preconditioning but conveys some of the important neuronal targets identified to date.

duction of erythropoietin<sup>73</sup> and activates adenosine triphosphate-dependent potassium channels,<sup>75</sup> indicating convergence on similar protective pathways whether initiated by hypoxia or xenon. Nonetheless, as NMDA antagonists can block hypoxic preconditioning in neurons<sup>76</sup> and have putative toxicity in the neonate,<sup>22</sup> clinical research is required to further understand the effects of these drugs on perinatal outcome.

Volatile anesthetics, such as isoflurane and sevoflurane, can also precondition the neonatal brain,<sup>77,78</sup> mimicking hypoxic preconditioning's dependence on the generation of nitric oxide (fig. 3). Because sevoflurane was proposed as an alternative to nitrous oxide for labor analgesia,<sup>79</sup> we have recently evaluated its preconditioning effects. Sevoflurane (1.5%) is able to precondition effectively against neonatal brain injury but had no effect at the approximate labor analgesia dose of 0.75% limiting its clinical application.<sup>78</sup> Interestingly, xenon (20%) and sevoflurane (0.75%) synergized in their ability to precondition in this model.<sup>77</sup> Xenon and

sevoflurane may converge on the preconditioning pathway at different levels as xenon activates adenosine triphosphate-dependent potassium channels to induce preconditioning but sevoflurane does not.<sup>75</sup> This combination could not only provide analgesia for the mother but also precondition the fetus. Practically, this could provide a neuroprotective combination at a lower cost than xenon alone; however, further advances in delivery technology will be required before translation into clinical trials.

Recent data have suggested that antenatal magnesium sulfate reduces the rate of cerebral palsy in premature infants.<sup>80,81</sup> It is possible that antenatal magnesium administration may in part act in a preconditioning manner to decrease vulnerability of the preterm brain to subsequent injury. However, the translatability of these findings in the preterm infant to the term infant is unclear<sup>82,83</sup> because of the significant differences between the forms of brain injury. Indeed, there are conflicting reports from the animal literature regarding the neuroprotective efficacy of magnesium,

with lack of temperature control a frequent confound. Magnesium has recently been demonstrated to induce neurodegeneration in the neonatal rodent brain<sup>84</sup> similar to the observations with other NMDA antagonists.<sup>22</sup> Therefore, prophylactic magnesium therapy may expose many infants unnecessarily to side effects such as tocolysis with potentially prolonged labor, hypotension, and respiratory depression<sup>1</sup> and possible neurotoxic effects.<sup>84</sup> Although the neuroprotective properties of magnesium for term infants should not necessarily be dismissed, preliminary investigations for postinsult neuroprotection have not been encouraging.<sup>2</sup>

## Postinsult Therapies

As HIE is often unpredictable, and currently preconditioning strategies are not clinically available, the primary approach has been to develop postinsult therapies to ameliorate ongoing or secondary injury. In this regard, hypothermia has proven clinically efficacious,<sup>61,62,85,86</sup> and subsequent strategies have focused on developing multimodal therapies that will augment hypothermic neuroprotection. We briefly review two important nonpharmacologic approaches to neuroprotection—therapeutic hypothermia and avoidance of hypocapnia—before reviewing future of pharmacologic neuroprotectants.

## Hypothermic Neuroprotection

In the 1950s and 1960s, several uncontrolled case series were published in which infants not breathing spontaneously at 5 min after birth were immersed in cold water until respiration resumed and then were allowed to rewarm spontaneously.<sup>87</sup> In Switzerland, hypothermia was used as a standard resuscitation for newborns who showed no response to the usual method of resuscitation after 5 min.<sup>88</sup> However, hypothermia fell into disrepute after the recognition that even mild hypothermia was associated with increased oxygen requirements and greater mortality in premature newborns (<1,500 g)<sup>89</sup>; unfortunately, clinical trials of hypothermic neuroprotection were not performed at this point.

More recently, description of the biphasic pattern of energy failure observed in experimental models<sup>9</sup> (fig. 1) and experience in adult animal models<sup>90</sup> provided a basis for the realization that rescue treatment after hypoxia–ischemia might reverse or ameliorate secondary energy failure. Experimental studies using moderate hypothermia neuroprotection<sup>91</sup> were followed by safety studies in the newborn. Subsequent trials and meta-analyses have shown efficacy of therapeutic hypothermia in reducing death and severe disability,<sup>61,62,85,86,92</sup> leading to therapeutic hypothermia becoming established as a standard of care for HIE.<sup>93</sup>

The three largest trials had similar entry criteria, consisting of evidence of birth asphyxia and moderate or severe encephalopathy and in addition in the CoolCap and Total Body Hypothermia for Neonatal Encephalopathy (TOBY) trials abnormal amplitude integrated electroencephalogram.<sup>61,62,86</sup> Infants were term (at least 36 weeks gestation)

and were randomized by 6 h of age. Hypothermia was maintained for 72 h, by circulating cooling fluid in a cap with a target rectal temperature of 34.5°C in the CoolCap trial, whereas in the Total Body Hypothermia for Neonatal Encephalopathy and National Institute of Child Health and Human Development Neonatal Research Network trials, whole body cooling to 33.5°C was induced by cooling blankets placed under the infants. Although each trial showed a reduction in the risk ratio for death and disability, this was statistically significant only in the National Institute of Child Health and Human Development Neonatal Research Network trial. A composite endpoint was chosen in all three trials because of concerns that cooling might increase survival with additional disability; however, this proved not to be the case. Indeed, the largest and most recent trial, the Total Body Hypothermia for Neonatal Encephalopathy trial, demonstrated a reduction in the number of children with cerebral palsy and improved more subtle cognitive and motor impairments in survivors.<sup>62</sup> Overall, hypothermia improves neurologic outcome in survivors without altering mortality from this devastating condition.<sup>61,62,85,86,92</sup> Consistent with this, neuroradiologic evidence shows that hypothermia reduces the incidence of thalamic, basal ganglia, internal capsule, and white matter lesions secondary to HIE, providing a morphologic correlate for the functional improvement.<sup>94,95</sup>

There are a number of possible mechanisms by which mild hypothermia may be neuroprotective after hypoxia–ischemia in the developing brain. Hypothermia reduces the metabolic rate (4–7% for a 1°C drop), decreases the release of glutamate and other excitotoxic neurotransmitters,<sup>96</sup> attenuates the activity of NMDA receptors,<sup>97</sup> reduces the production of nitric oxide and oxygen free radicals,<sup>98</sup> inhibits apoptosis<sup>99</sup> (fig. 2), and contributes to a reduction in intracranial pressure.<sup>99</sup> Although mild to moderate hypothermia seems to be well tolerated in experimental models and human studies,<sup>61,62,85,86,92</sup> there are some potentially deleterious effects that include infection, cardiac suppression, coagulopathy, arrhythmias, reduced cerebral blood flow, increased thermogenesis, and increased blood viscosity. There is likely to be a threshold temperature below which the adverse effects outweigh the beneficial effects, and further work is needed to define the optimal temperature for neuroprotection.<sup>99</sup>

Interestingly, adequate sedation was required to realize the benefit of hypothermic neuroprotection in one large animal model<sup>100</sup>; however, details about the sedative therapies used in the hypothermia trials were not reported in detail. It is likely that different sedatives will interact dissimilarly with hypothermic neuroprotection; for example, addition of methohexital to hypothermic neuroprotection showed no additional protective benefit over hypothermia alone<sup>101</sup> in an animal model of focal ischemia. This is in contrast to other agents such as xenon,<sup>26</sup> topiramate,<sup>27</sup> or *N*-acetylcysteine<sup>102</sup> that provide synergistic neuroprotection with hypothermia. Therefore, detailing which sedative agents can augment hypothermic neuroprotection has critical importance.



## Avoidance of Hypocapnia

Hypocapnia has also been associated with neonatal brain damage in several observational studies,<sup>103</sup> although these were heterogeneous in design, the underlying conclusion remains that hypocapnia is associated with poor neurologic outcome. Hypocapnic ventilation of neonatal piglets causes perturbation of cellular energetics and apoptosis<sup>104</sup> that may be related to vasoconstriction and reduced tissue oxygen delivery. Hypocapnia in human infants has also been associated with a slower electroencephalogram signal and increased cerebral oxygen extraction that may reflect hypocapnic vasoconstriction.<sup>105</sup> During hypoxia-ischemia, hypocapnia is also associated with a detrimental effect on cerebral energetics with a reduced phosphocreatine and adenosine triphosphate relative to normocapnia or hypercapnia in the neonatal rat.<sup>106</sup> During reperfusion from neonatal HIE, intracellular neuronal alkalosis is associated with adverse long-term neurologic outcome,<sup>38</sup> and thus, hypocapnia during this phase could also further disturb local acid-base imbalance. The importance of intracellular pH during reperfusion has led to the identification of novel neuroprotective strategies such as the use of the  $\text{Na}^+/\text{H}^+$  exchange inhibitor amiloride, to ameliorate reperfusion injury.<sup>107</sup> Hypocapnia should be avoided in the very young in the absence of a therapeutic indication such as raised intracranial pressure or neonatal pulmonary vascular resistance. As hypocapnia may easily occur during resuscitation (which of course may be necessary) but also during transfer from delivery suite to neonatal intensive care medical staff must be mindful to avoid overventilation of the neonate.

## Pharmacologic Neuroprotection

The optimal regimen to improve neuroprotection during hypothermic therapy has not been addressed formally. The antiepileptic drug, topiramate, shows promise in this regard as it synergizes with hypothermic neuroprotection,<sup>27</sup> similar to xenon<sup>26</sup> and *N*-acetylcysteine.<sup>102</sup> Preclinical evidence suggests that some classes of sedative drug may be particularly effective; notable in this category are agents which antagonize the NMDA receptor or activate the  $\alpha_2$ -adrenoceptor. NMDA receptor antagonists do, however, induce widespread apoptosis in the immature brain that may hamper their use.<sup>22</sup> Opioid sedation is typically used in neonatal intensive care units despite evidence that opioids have been shown to worsen hypoxic-ischemic injury in adult animal models,<sup>108</sup> and opioid antagonists have been investigated as neuroprotective agents.<sup>109</sup> Whether immature animals are similarly vulnerable to opioid-induced potentiation of hypoxic-ischemic injury warrants investigation. Supplementation of opioid sedation with benzodiazepines has also been suggested; however, midazolam administration has been associated with worse neurologic outcomes in preterm neonates.<sup>110</sup> Given concerns over the neurotoxicity of benzodiazepines,<sup>24,25</sup> investigation of whether this also pertains to term neonates should be undertaken. Alternate sedative regimens may be useful in neonates stricken by HIE. Other neuroprotec-

tive adjuncts to potentiate hypothermia may include antioxidants and antiinflammatory therapies.

Unfortunately, most neuroprotective agents tested so far have been ineffective. Mannitol therapy has not proven successful in clinical<sup>2</sup> or preclinical studies.<sup>111</sup> Calcium channel blockers are associated with decreased cerebral flow and are similarly not recommended for the treatment of perinatal HIE.<sup>2</sup> Dexamethasone is not recommended as it reduces cerebral perfusion pressure in line with its ability to reduce intracranial pressure.<sup>2,112</sup> Furthermore, the increase in intracranial pressure observed in HIE may be an epiphenomenon rather than a mechanism of injury.

## Antiepileptic Therapy

Data from both animal and human studies suggest that seizures amplify neonatal hypoxic-ischemic brain damage.<sup>113,114</sup> In a recent study of newborns with HIE where magnetic resonance spectroscopy was used to assess tissue metabolic integrity, the severity of seizures was independently associated with brain injury.<sup>114,115</sup> These results provide some support for the hypothesis that effective treatment of neonatal seizures could attenuate brain injury. Barbiturates are often used in the treatment of neonatal seizures; however, it is unclear whether their antiseizure actions translate into neuroprotection. Three small clinical trials have investigated the potential role of barbiturates to ameliorate brain injury severity, but only one showed a relative risk reduction of severe developmental disability or death.<sup>116</sup> However, 23% patients were lost to follow-up in this trial. Two other trials<sup>117,118</sup> did not find thiopentone or pentobarbitone effective. Subsequent meta-analysis of the studies ( $n = 77$ ) showed no significant effect on death or severe neurodevelopmental disability.<sup>2</sup> As avoidance of hypotension is desirable in the asphyxiated infant, current evidence does not support the use of prophylactic barbiturates for perinatal neuroprotection. Barbiturates still have a role in the treatment of seizures, and further study is required to investigate whether they possess neuroprotective efficacy. Similar to NMDA antagonists, there is ongoing concern that in experimental studies of rodents conventional antiepileptic drugs, including phenobarbital, phenytoin, and diazepam, caused apoptotic neurodegeneration at plasma concentrations relevant for seizure control in human neonates.<sup>23</sup>

The antiepileptic, topiramate (an antagonist of  $\alpha$ -amino-3-hydroxy-5-methylisoxazole-4-propionic acid receptors), improves neurologic function and decreases preoligodendrocyte death, apoptosis, microglial activation, and seizure activity in animal models.<sup>119</sup> Unlike other antiepileptics, topiramate seems to be nontoxic.<sup>120</sup> Postinsult neuroprotection has also been noted after hypoxic-ischemic injury in piglets.<sup>121</sup> Perhaps of most significance is the discovery that topiramate potentiates hypothermic neuroprotection in rats.<sup>27</sup>

Recent studies have also demonstrated the neuroprotective efficacy of the NKCC1 blocker bumetanide, alone or in conjunction with phenobarbital.<sup>122</sup> Further combi-

nation studies looking at the combination of prophylactic antiepileptic administration and therapeutic hypothermia are required.

### $\alpha_2$ -Adrenoceptor Agonists

$\alpha_2$ -Adrenoceptor agonists, including clonidine and dexmedetomidine, have been shown to have neuroprotective potential in animal models of HIE.<sup>123–125</sup> Both agents reduced the size of excitotoxin-induced cortical and white matter lesions in mouse pups injected intracerebrally with ibotenate<sup>123</sup>; these protective effects were abolished by an  $\alpha_2$  antagonist confirming that these agents protect through their activity at the  $\alpha_2$ -adrenoceptor. Clonidine has been shown to improve the outcome in preterm fetal sheep when given after the hypoxic–ischemic insult (started 15 min after a 25-min umbilical cord occlusion and continued for 4 h).<sup>124</sup> Interestingly, only low-dose clonidine ( $10 \mu\text{g} \cdot \text{kg}^{-1} \cdot \text{h}^{-1}$ ) and not the high dose ( $100 \mu\text{g} \cdot \text{kg}^{-1} \cdot \text{h}^{-1}$ ) was protective. This may relate to the poor  $\alpha_2:\alpha_1$  selectivity ratio of clonidine resulting in loss of effect of the drug at the higher dose.

The more selective  $\alpha_2$ -adrenoceptor agonist of the two agents, dexmedetomidine, dose-dependently reduces neuronal injury *in vitro* and *in vivo* in a neonatal asphyxia rat model.<sup>125</sup> Dexmedetomidine, administered during the asphyxia, improved the neuromotor function when assessed 30 days later. Whether dexmedetomidine can exert neuroprotection when provided after the onset of injury is not known. However, as dexmedetomidine can target different aspects of ongoing injury, including excitotoxicity, inflammation, and apoptosis, it has the potential to be beneficial even when delivered after the initial hypoxic–ischemic insult. It should also be noted that a synergistic interaction between dexmedetomidine and the NMDA antagonist, xenon, has been noted in this model,<sup>126</sup> although any possible neuroprotective interaction between dexmedetomidine and hypothermia has not been investigated. However as dexmedetomidine is the more selective agent (compared with clonidine), it seems prudent to pursue this agent as the  $\alpha_2$ -adrenoceptor agonist of choice for neuroprotection.

### NMDA Receptor Antagonists

The central role of the NMDA receptor in excitotoxic injury makes it a prominent target for neuroprotective strategies (fig. 2). Indeed, the neonatal brain seems particularly vulnerable to excitotoxicity,<sup>12</sup> and NMDA receptor expression is upregulated after HIE<sup>127</sup> (in contrast to reduced  $\gamma$ -aminobutyric acid type A receptor expression<sup>128</sup>). Therefore, the application of NMDA antagonists during and after the insult seems a promising therapeutic strategy.<sup>26,129–131</sup> As discussed earlier (in Preconditioning), antenatal magnesium therapy has shown potential to reduce cerebral palsy when given before preterm labor.<sup>80–81</sup> Yet, although magnesium can act to block the NMDA receptor, there is a lack of evidence to support it as a postinsult neuroprotectant.<sup>82,83</sup> Other NMDA antagonists in current clinical use include the anes-

thetics, nitrous oxide and ketamine, that are both used in obstetric practice. Interestingly, their neuroprotective capabilities are variably reported.<sup>132</sup> NMDA antagonists have been associated recently with neurotoxicity (apoptotic neurodegeneration) in the very young,<sup>22,25</sup> and thus, despite having therapeutic properties for areas of hypoxic–ischemic injury, they may also injure the developing brain. This has led to concern both to their application for neuroprotection in the neonatal brain and their use in obstetric and pediatric anesthesia.<sup>25</sup>

Xenon, also an NMDA antagonist, does not produce significant apoptotic neurodegeneration in the young<sup>133</sup> but provides neuroprotection in several adult animal models of neuronal injury.<sup>117</sup> Furthermore, xenon attenuates hypoxic–ischemic neuronal damage in animal models of HIE *in vivo* and *in vitro* at concentrations of 40% and greater, and thus, xenon offers neuroprotection at subanesthetic concentrations.<sup>26</sup> Xenon attenuated hypoxic–ischemic damage, including apoptosis, when given up to 6 h after the injury and provided synergistic neuroprotection when given postinjury in combination with hypothermia (35°C). Remarkably, this synergistic interaction still occurs when the administration of hypothermia and xenon occurs asynchronously.<sup>134</sup> The neuroprotection observed correlated with improved neuromotor function at 30 days of age, indicating long-term functional protection.<sup>26</sup> Xenon and hypothermic therapy may converge on an antiapoptotic pathway accounting for why asynchronous application of the interventions attenuates the injury. This asynchronous administration of xenon and hypothermia could be used in a clinical context with hypothermia being instituted soon after delivery before transfer to a tertiary center for subsequent xenon therapy that requires specialized administration apparatus. Indeed, in the piglet model, therapeutic hypothermia doubles the duration of the therapeutic window for adjunctive therapies.<sup>135</sup> Consistent with this, we have demonstrated recently that xenon augments hypothermic neuroprotection in the piglet model improving cerebral magnetic resonance biomarkers of injury and histology.<sup>136</sup> This supports transition to a clinical trial (TOBYX; NCT00934700), where the efficacy of the combination of hypothermia and xenon will be tested against cerebral magnetic resonance biomarkers and clinical outcomes.

### Erythropoietin

Erythropoietin exerts trophic properties to promote neurogenesis and differentiation in the brain and induce proangiogenic effects *via* downstream effectors such as vascular endothelial growth factor. Erythropoietin also acts to inhibit oxidative stress, excitotoxicity, inflammation, and apoptosis.<sup>137</sup> Interestingly, erythropoietin has been reported to be upregulated in the umbilical cord blood from babies who have suffered perinatal asphyxia.<sup>138</sup> This may represent a defense mechanism as erythropoietin is neuroprotective when given after hypoxic–ischemic injury providing long-

term neuroprotection in preclinical models.<sup>139,140</sup> Research probing any interaction with hypothermic neuroprotection is required before progression to clinical trials of combined therapy. Indeed, further clinical safety data are also required as erythropoietin has poor penetration (<2%) of the blood-brain barrier, and therefore, in animal studies, large doses are required to transduce a neuroprotective effect.<sup>141</sup> Concerns over the use of high doses of erythropoietin include possible thrombotic and hematologic complications. Nonetheless, a randomized controlled trial has been published recently of erythropoietin therapy for HIE.<sup>142</sup> Despite only enrolling 167 term infants (with 9 lost to follow-up), erythropoietin treatment reduced the risk of death or disability at 18 months.<sup>142</sup> Two relatively low doses of erythropoietin were administered (300 or 500 U/kg) without hematopoietic complications. Whether the higher doses can further improve the outcomes without inducing complications is unknown but is of distinct interest. Another approach is to upregulate endogenous erythropoietin; for example, xenon upregulates erythropoietin expression<sup>73</sup> and easily crosses the blood-brain barrier providing an alternative mechanism to harness erythropoietin protection in the central nervous system.

### Avoiding Hyperoxia and the Use of Antioxidants and Free Radical Scavengers

Free radical-induced cellular damage contributes significantly to HIE, partly, because of the relative deficiency of endogenous antioxidants.<sup>3,14</sup> This reasoning prompted clinical trials analyzing the safety of neonatal resuscitation with air rather than oxygen. Hyperoxia induced by ventilation with 100% oxygen is associated with reduced cerebral blood flow,<sup>143</sup> production of free radicals such as hydrogen peroxide,<sup>18</sup> increased inflammation, and neuronal apoptosis<sup>144</sup> compounding concerns over hyperoxia-stimulated retrolental fibroplasia. Although no individual trial has shown difference in mortality with resuscitation with air rather than oxygen, in 2005, a meta-analysis found that resuscitation with air is associated with a reduction in mortality<sup>145</sup> (relative risk, 0.71; 95% CI, 0.54–0.94; numbers needed to treat = 20). Further meta-analysis supports this finding with a mortality benefit apparent within the first week and from 1 month onward, suggesting that it is not just short-term mortality that is affected.<sup>146</sup> Saugstad *et al.*<sup>147</sup> in their meta-analysis concluded that the relative risk was improved to a greater extent in the studies with stricter randomization protocols (relative risk, 0.32; 95% CI, 0.12–0.84). A trend toward moderate to severe HIE reduction was also seen (relative risk, 0.88; 95% CI, 0.12–0.84). At present, there are insufficient data to determine whether air resuscitation may reduce neurodevelopment delay and cerebral palsy. Although the finding of a mortality difference is remarkable, it is biologically plausible and, therefore, requires further evaluation. Further trials of other oxygen concentrations are also warranted as are trials designed at specific subgroups that may require higher

oxygen concentrations such as severe asphyxia or sepsis. Furthermore, for resuscitation of babies from mothers who have recently used nitrous oxide for labor analgesia or after cesarean section conducted under general anesthesia with high concentrations of nitrous oxide it may be prudent initially to use higher concentrations of oxygen during neonatal resuscitation to avoid any nitrous oxide-induced diffusion hypoxia in the immediate postpartum period.<sup>148</sup>

Other strategies to reduce free radical generation include the use of xanthine oxidase inhibitors that have shown protection of cerebral energetics when administered early during the reperfusion phase but did not attenuate brain morphologic damage or markers of apoptosis.<sup>149</sup> However, in a further study, allopurinol did provide histologic neuroprotection.<sup>150</sup> Although allopurinol reduced circulating concentrations of free radicals in human neonates with HIE (using reduced malondialdehyde level as a marker of lipid peroxidation),<sup>151</sup> early results from one randomized controlled trial in humans were not promising<sup>152</sup>; however, an ongoing trial in The Netherlands, and a recent report, based on the reduction of the putative brain injury biomarker, S-100 $\beta$ , have suggested more promise with maternal allopurinol therapy.<sup>153</sup>

Melatonin (*N*-acetyl-5-methoxytryptamine) is a natural neuroprotectant produced in the pineal gland, retina, and gastrointestinal tract; exogenously administered melatonin crosses the blood-brain barrier and acts as a potent free radical scavenger and antioxidant. In adult animal models, melatonin provides neuroprotection when administered before<sup>154</sup> and after hypoxia-ischemia.<sup>155</sup> In mice, delayed melatonin treatment reduced both gray and white matter damage and improved neurobehavioral outcome after transient focal cerebral hypoxia-ischemia<sup>156</sup> and prevented excitotoxic white matter lesions in newborn mice.<sup>157</sup> Further preclinical and clinical studies are under way to elucidate whether melatonin can play a role as a neuroprotective agent for HIE and whether it can enhance hypothermic neuroprotection.

*N*-Acetylcysteine is a widely used free radical scavenger and has shown utility in animal models of HIE. Notably *N*-acetylcysteine provided superior protection to melatonin with evidence for better antioxidant, antiinflammatory, and antiapoptotic effect in a rat model of lipopolysaccharide sensitized perinatal hypoxic-ischemic injury.<sup>158</sup> *N*-Acetylcysteine (200 mg/kg) given before and after hypoxic-ischemic injury reduced brain injury by up to 78%, whereas postinsult therapy alone reduced the injury by 41%. As both inflammation<sup>159</sup> and hypoxic-ischemic brain injury<sup>160</sup> increase blood-brain barrier permeability, it is possible that improved penetration of some neuroprotectants such as *N*-acetylcysteine may occur, enhancing their therapeutic potential. Nonetheless, *N*-acetylcysteine has to be administered in high doses if given systemically to overcome the limited passage across the blood-brain barrier. *N*-Acetylcysteine (50 mg/kg) has also been shown to augment hypothermic neuroprotection in one small preclinical study of HIE; however, it was inef-



fective when tested alone.<sup>102</sup> Further evaluation of antioxidant combination with hypothermia is required.

## Antiinflammatory Agents

As described earlier, inflammation is believed to potentiate hypoxic-ischemic injury in the brain (fig. 2), explaining why maternal infection predisposes to worse outcomes from hypoxic-ischemic injury in the neonate.<sup>30,42</sup> This has been demonstrated in multiple animal models with the critical role of microglial activation and release of inflammatory cytokines such as tumor necrosis factor  $\alpha$ , interleukin-1 $\beta$ , and interleukin-6 noticed in these settings. Caspase-1 activation of interleukin-1 $\beta$  and interleukin-18 (expressed in activated microglia) are important mediators of the injury as caspase-1<sup>161</sup> or interleukin-18<sup>162</sup> gene deficiency reduces injury and the interleukin-1 receptor antagonist offers protection also in the immature brain.<sup>163</sup> Reducing microglial activation with immune modulators, such as the tetracycline derivative, minocycline, has shown promise in multiple animal models and is under investigation as a therapeutic in adult stroke. Unfortunately, a lack of consistency in neonatal animal models has occurred with both inefficacy and increased toxicity observed.<sup>3</sup>

## Summary

Defining the optimal strategy for perinatal neuroprotection has a potential to improve significantly the neurocognitive outcome after asphyxial injury. Further advances in the identification of the "at risk" fetus and neonate are required. In parallel, investigation of safe preconditioning strategies should continue in an attempt to improve the perinatal outcomes. Postinsult treatment should concentrate on augmenting hypothermic neuroprotection *via* the application of adjunctive agents. In this regard, combining hypothermia with xenon (that targets NMDA receptors) and topiramate (that targets  $\alpha$ -amino-3-hydroxy-5-methylisoxazole-4-propionic acid receptors) may be useful. The incorporation of  $\alpha_2$ -adrenoceptor agonists, melatonin, and *N*-acetylcysteine, which act through defined and different mechanisms, may also be of use. Significant preclinical advances in the development of neuroprotective strategies are occurring and with further studies addressing their efficacy in different animal models clinical trials could follow in the near future.

## References

- Shankaran S, Laptook AR: Hypothermia as a treatment for birth asphyxia. *Clin Obstet Gynecol* 2007; 50:624-35
- Whitelaw A, Thoresen M: Clinical trials of treatments after perinatal asphyxia. *Curr Opin Pediatr* 2002; 14:664-8
- Gonzalez FF, Ferriero DM: Therapeutics for neonatal brain injury. *Pharmacol Ther* 2008; 120:43-53
- Lawn JE, Cousens S, Zupan J: Lancet neonatal survival steering team: Four million neonatal deaths: When? Where? Why? *Lancet* 2005; 365:891-900
- Rennie JM, Hagmann CF, Robertson NJ: Outcome after

intrapartum hypoxic ischemia at term. *Semin Fetal Neonatal Med* 2007; 12:398-407

- Odd DE, Lewis G, Whitelaw A, Gunnell D: Resuscitation at birth and cognition at 8 years of age: A cohort study. *Lancet* 2009; 373:1615-22
- Rennie JM, Hagmann CF, Robertson NJ: The baby who was depressed at birth. *Neonatal Cerebral Investigation Text Book*. Edited by Hagmann CF, Robertson NJ, Rennie JM. Cambridge, Cambridge University Press, 2008, pp 130-72
- Azzopardi D, Wyatt JS, Cady EB, Delpy DT, Baudin J, Stewart AL, Hope PL, Hamilton PA, Reynolds EO: Prognosis of newborn infants with hypoxic-ischemic brain injury assessed by phosphorus magnetic resonance spectroscopy. *Pediatr Res* 1989; 25:445-51
- Lorek A, Takei Y, Cady EB, Wyatt JS, Penrice J, Edwards AD, Peebles D, Wylezinska M, Owen-Reece H, Kirkbride V, Cooper CE, Aldridge RF, Roth SC, Brown G, Delpy DT, Reynolds EO: Delayed (secondary) cerebral energy failure after acute hypoxia-ischemia in the newborn piglet: Continuous 48-hour studies by phosphorus magnetic resonance spectroscopy. *Pediatr Res* 1994; 36:699-706
- Hagberg H, Thornberg E, Blennow M, Kjellmer I, Lagercrantz H, Thiringer K, Hamberger A, Sandberg M: Excitatory amino acids in the cerebrospinal fluid of asphyxiated infants: Relationship to hypoxic-ischemic encephalopathy. *Acta Paediatr* 1993; 82:925-9
- Haberny KA, Paule MG, Scallet AC, Sistare FD, Lester DS, Hanig JP, Slikker W Jr: Ontogeny of the *N*-methyl-D-aspartate (NMDA) receptor system and susceptibility to neurotoxicity. *Toxicol Sci* 2002; 68:9-17
- Ikonomidou C, Mosinger JL, Salles KS, Labruyere J, Olney JW: Sensitivity of the developing rat brain to hypobaric/ischemic damage parallels sensitivity to *N*-methyl-D-aspartate neurotoxicity. *J Neurosci* 1989; 9:2809-18
- Monyer H, Burnashev N, Laurie DJ, Sakmann B, Seeburg PH: Developmental and regional expression in the rat brain and functional properties of four NMDA receptors. *Neuron* 1994; 12:529-40
- Blomgren K, Hagberg H: Free radicals, mitochondria, and hypoxia-ischemia in the developing brain. *Free Radic Biol Med* 2006; 40:388-97
- Rivera C, Voipio J, Payne JA, Ruusuvo E, Lahtinen H, Lamsa K, Pirvola U, Saarma M, Kaila K: The Kp/Clc-transporter KCC2 renders GABA hyperpolarizing during neuronal maturation. *Nature* 1999; 397:251-5
- Puka-Sundvall M, Gajkowska B, Cholewinski M, Blomgren K, Lazarewicz JW, Hagberg H: Subcellular distribution of calcium and ultrastructural changes after cerebral hypoxia-ischemia in immature rats. *Brain Res Dev Brain Res* 2000; 125:31-41
- Gilland E, Puka-Sundvall M, Hillered L, Hagberg H: Mitochondrial function and energy metabolism after hypoxia-ischemia in the immature rat brain: Involvement of NMDA-receptors. *J Cereb Blood Flow Metab* 1998; 18:297-304
- Kutzsche S, Ilves P, Kirkeby OJ, Saugstad OD: Hydrogen peroxide production in leukocytes during cerebral hypoxia and reoxygenation with 100% or 21% oxygen in newborn piglets. *Pediatr Res* 2001; 49:834-42
- Zhu C, Wang X, Xu F, Bahr BA, Shibata M, Uchiyama Y, Hagberg H, Blomgren K: The influence of age on apoptotic and other mechanisms of cell death after cerebral hypoxia-ischemia. *Cell Death Differ* 2005; 12:162-76
- Edwards AD, Mehmet H: Apoptosis in perinatal hypoxic-ischemic cerebral damage. *Neuropathol Appl Neurobiol* 1996; 22:494-8
- Wang X, Carlsson Y, Basso E, Zhu C, Rousset CI, Rasola A, Johansson BR, Blomgren K, Mallard C, Bernardi P, Forte MA, Hagberg H: Developmental shift of cyclophilin D



- contribution to hypoxic-ischemic brain injury. *J Neurosci* 2009; 29:2588–96
22. Ikonomidou C, Bosch F, Miksa M, Bittigau P, Vöckler J, Dikranian K, Tenkova TI, Stefovskaja V, Turski L, Olney JW: Blockade of NMDA receptors and apoptotic neurodegeneration in the developing brain. *Science* 1999; 283:70–4
  23. Bittigau P, Siffringer M, Genz K, Reith E, Pospischil D, Govindarajulu S, Dzietko M, Pesditschek S, Mai I, Dikranian K, Olney JW, Ikonomidou C: Antiepileptic drugs and apoptotic neurodegeneration in the developing brain. *Proc Natl Acad Sci U S A* 2002; 99:15089–94
  24. Jevtovic-Todorovic V, Hartman RE, Izumi Y, Benshoff ND, Dikranian K, Zorumski CF, Olney JW, Wozniak DF: Early exposure to common anesthetic agents causes widespread neurodegeneration in the developing rat brain and persistent learning deficits. *J Neurosci* 2003; 23:876–82
  25. Sanders RD, Ma D, Brooks P, Maze M: Balancing paediatric anaesthesia: Preclinical insights into analgesia, hypnosis, neuroprotection, and neurotoxicity. *Br J Anaesth* 2008; 101:597–609
  26. Ma D, Hossain M, Chow A, Arshad M, Battson RM, Sanders RD, Mehmet H, Edwards AD, Franks NP, Maze M: Xenon and hypothermia combine to provide neuroprotection from neonatal asphyxia. *Ann Neurol* 2005; 58:182–93
  27. Liu Y, Barks JD, Xu G, Silverstein FS: Topiramate extends the therapeutic window for hypothermia-mediated neuroprotection after stroke in neonatal rats. *Stroke* 2004; 35:1460–5
  28. Grether JK, Nelson KB: Maternal infection and cerebral palsy in infants of normal birth weight. *JAMA* 1997; 277:207–11
  29. Aziz K, Chadwick M, Baker M, Andrews W: Ante- and intra-partum factors that predict increased need for neonatal resuscitation. *Resuscitation* 2008; 79:444–52
  30. Badawi N, Kurinczuk JJ, Keogh JM, Alessandri LM, O'Sullivan F, Burton PR, Pemberton PJ, Stanley FJ: Intrapartum risk factors for newborn encephalopathy: The Western Australian case-control study. *BMJ* 1998; 317:1554–8
  31. Lieberman E, Eichenwald E, Mathur G, Richardson D, Heffner L, Cohen A: Intrapartum fever and unexplained seizures in term infants. *Pediatrics* 2000; 106:983–8
  32. Edwards AD, Tan S: Perinatal infections, prematurity and brain injury. *Curr Opin Pediatr* 2006; 18:119–24
  33. Yoon BH, Jun JK, Romero R, Park KH, Gomez R, Choi JH, Kim IO: Amniotic fluid inflammatory cytokines (interleukin-6, interleukin-1 $\beta$ , and tumor necrosis factor- $\alpha$ ), neonatal brain white matter lesions, and cerebral palsy. *Am J Obstet Gynecol* 1997; 177:19–26
  34. Eklind S, Mallard C, Leverin AL, Gilland E, Blomgren K, Mattsby-Baltzer I, Hagberg H: Bacterial endotoxin sensitizes the immature brain to hypoxic-ischaemic injury. *Eur J Neurosci* 2001; 13:1101–6
  35. Loddick SA, Turnbull AV, Rothwell NJ: Cerebral interleukin-6 is neuroprotective during permanent focal cerebral ischemia in the rat. *J Cereb Blood Flow Metab* 1998; 18:176–9
  36. Iwata O, Iwata S, Thornton JS, De Vita E, Bainbridge A, Herbert L, Scaravilli F, Peebles D, Wyatt JS, Cady EB, Robertson NJ: Therapeutic time window duration decreases with increasing severity of cerebral hypoxia-ischemia under normothermia and delayed hypothermia in the newborn piglet. *Brain Res* 2007; 1154:173–80
  37. Roth SC, Baudin J, Cady E, Johal K, Townsend JP, Wyatt JS, Reynolds EO, Stewart A: Relation of deranged neonatal cerebral oxidative metabolism with neurodevelopmental outcome and head circumference at 4 years. *Dev Med Child Neurol* 1997; 39:718–25
  38. Robertson NJ, Cowan FM, Cox IJ, Edwards AD: Brain alkaline intracellular pH after neonatal encephalopathy. *Ann Neurol* 2002; 52:732–42
  39. McGowan JE, Perlman JM: Glucose management during and after intensive delivery room resuscitation. *Clin Perinatol* 2006; 33:183–9
  40. Lou HC, Lassen NA, Friis-Hansen B: Impaired autoregulation of cerebral blood flow in the distressed newborn infant. *J Pediatr* 1979; 94:118–21
  41. Volpe J: Hypoxic-ischemic encephalopathy: Biochemical and Physiological Aspects, *Neurology of The Newborn*, 5th edition. Edited by Volpe J. Philadelphia, Elsevier, 2008, pp 247–325
  42. Badawi N, Kurinczuk JJ, Keogh JM, Alessandri LM, O'Sullivan F, Burton PR, Pemberton PJ, Stanley FJ: Antepartum risk factors for newborn encephalopathy: The Western Australian case-control study. *BMJ* 1998; 317:1549–53
  43. Cowan F, Rutherford M, Groenendaal F, Eken P, Mercuri E, Bydder GM, Meiners LC, Dubowitz LM, de Vries LS: Origin and timing of brain lesions in term infants with neonatal encephalopathy. *Lancet* 2003; 361:736–42
  44. American Academy of Pediatrics, American College of Obstetricians and Gynecologists: Neonatal encephalopathy and cerebral palsy: Defining the pathogenesis and pathophysiology. Washington, DC, American Academy of Pediatrics, 2003
  45. Graham EM, Petersen SM, Christo DK, Fox HE: Intrapartum electronic fetal heart rate monitoring and the prevention of perinatal brain injury. *Obstet Gynecol* 2006; 108:656–66
  46. Kubli FW, Hon EH, Khazin AF, Takemura H: Observations on heart rate and pH in the human fetus during labor. *Am J Obstet Gynecol* 1969; 104:1190–206
  47. Nelson KB, Dambrosia JM, Ting TY, Grether JK: Uncertain value of electronic fetal monitoring in predicting cerebral palsy. *N Engl J Med* 1996; 334:613–8
  48. Low JA, Victory R, Derrick EJ: Predictive value of electronic fetal monitoring for intrapartum fetal asphyxia with metabolic acidosis. *Obstet Gynecol* 1999; 93:285–91
  49. Ikeda T, Murata Y, Quilligan EJ, Choi BH, Parer JT, Doi S, Park SD: Physiologic and histologic changes in near-term fetal lambs exposed to asphyxia by partial umbilical cord occlusion. *Am J Obstet Gynecol* 1998; 178:24–32
  50. Alfrevic Z, Devane D, Gyte GM: Continuous cardiotocography (CTG) as a form of electronic fetal monitoring (EFM) for fetal assessment during labor. *Cochrane Database Syst Rev* 2006; 3:CD006066
  51. Vintzileos AM, Antsaklis A, Varvarigos I, Papas C, Sofatzis I, Montgomery JT: A randomized trial of intrapartum electronic fetal heart rate monitoring *versus* intermittent auscultation. *Obstet Gynecol* 1993; 81:899–907
  52. Wiberg-Itzel E, Lippner C, Norman M, Herbst A, Prebensen D, Hansson A, Bryngelsson AL, Christofferson M, Sennström M, Wennerholm UB, Nordström L: Determination of pH or lactate in fetal scalp blood in management of intrapartum fetal distress: Randomized controlled multicentre trial. *BMJ* 2008; 336:1284–7
  53. ACOG Committee on Obstetric Practice: ACOG Committee Opinion No. 348, November 2006: Umbilical cord blood gas and acid-base analysis. *Obstet Gynecol* 2006; 108:1319–22
  54. Graham EM, Ruis KA, Hartman AL, Northington FJ, Fox HE: A systematic review of the role of intrapartum hypoxia-ischemia in the causation of neonatal encephalopathy. *Am J Obstet Gynecol* 2008; 199:587–95
  55. Neilson JP: Fetal electrocardiogram (ECG) for fetal monitoring during labour. *Cochrane Database Syst Rev* 2006; 3:CD000116
  56. Siristatidis C, Salamalekis E, Kassanos D, Loghis C, Creatsas G: Evaluation of fetal intrapartum hypoxia by middle

- cerebral and umbilical artery Doppler velocimetry with simultaneous cardiotocography and pulse oximetry. *Arch Gynecol Obstet* 2004; 270:265-70
57. American Academy of Pediatrics and American College of Obstetricians and Gynecologists: Care of the Neonate, Guidelines for Perinatal Care, 5th edition. Edited by Gilstrap LC, Oh W. Elk Grove Village, IL, American Academy of Pediatrics, 2002, pp 187-235
  58. Casey BM, McIntire DD, Leveno KJ: The continuing value of the Apgar score for the assessment of newborn infants. *N Engl J Med* 2001; 344:467-71
  59. Sarnat HB, Sarnat MS: Neonatal encephalopathy following fetal distress. A clinical and electroencephalographic study. *Arch Neurol* 1976; 33:696-705
  60. Shah DK, de Vries LS, Hellström-Westas L, Toet MC, Inder TE: Amplitude-integrated electroencephalography in the newborn: A valuable tool. *Pediatrics* 2008; 122:863-5
  61. Gluckman PD, Wyatt JS, Azzopardi D, Ballard R, Edwards AD, Ferriero DM, Polin RA, Robertson CM, Thoresen M, Whitelaw A, Gunn A: Selective head cooling with mild systemic hypothermia after neonatal encephalopathy: Multicentre randomized trial. *Lancet* 2005; 365:663-70
  62. Azzopardi DV, Strohm B, Edwards AD, Dyet L, Halliday HL, Juszczak E, Kapellou O, Levene M, Marlow N, Porter E, Thoresen M, Whitelaw A, Brocklehurst P: Moderate hypothermia to treat perinatal asphyxial encephalopathy. *N Engl J Med* 2009; 361:1349-58
  63. Toet MC, Lemmers PM, van Schelven IJ, van Bel F: Cerebral oxygenation and electrical activity after birth asphyxia: Their relation to outcome. *Pediatrics* 2006; 117:333-9
  64. Cady EB, Iwata O, Bainbridge A, Wyatt JS, Robertson NJ: Phosphorus magnetic resonance spectroscopy 2 h after perinatal cerebral hypoxia-ischemia prognosticates outcome in the newborn piglet. *J Neurochem* 2008; 107:1027-35
  65. Hanrahan JD, Sargentoni J, Azzopardi D, Manji K, Cowan FM, Rutherford MA, Cox IJ, Bell JD, Bryant DJ, Edwards AD: Cerebral metabolism within 18 hours of birth asphyxia: A proton magnetic resonance spectroscopy study. *Pediatr Res* 1996; 39:584-90
  66. Gustavsson M, Anderson MF, Mallard C, Hagberg H: Hypoxic preconditioning confers long-term reduction of brain injury and improvement of neurological ability in immature rats. *Pediatr Res* 2005; 57:305-9
  67. Cai Z, Fratkin JD, Rhodes PG: Prenatal ischemia reduces neuronal injury caused by neonatal hypoxia-ischemia in rats. *Neuroreport* 1997; 8:1393-8
  68. Gustavsson M, Mallard C, Vannucci SJ, Wilson MA, Johnston MV, Hagberg H: Vascular response to hypoxic preconditioning in the immature brain. *J Cereb Blood Flow Metab* 2007; 27:928-38
  69. Gustavsson M, Wilson MA, Mallard C, Rousset C, Johnston MV, Hagberg H: Global gene expression in the developing rat brain after hypoxic preconditioning: Involvement of apoptotic mechanisms? *Pediatr Res* 2007; 61:444-50
  70. Brucklacher RM, Vannucci RC, Vannucci SJ: Hypoxic preconditioning increases brain glycogen and delays energy depletion from hypoxia-ischemia in the immature rat. *Dev Neurosci* 2002; 24:411-7
  71. Hamrick SE, McQuillen PS, Jiang X, Mu D, Madan A, Ferriero DM: A role for hypoxia-inducible factor-1alpha in desferoxamine neuroprotection. *Neurosci Lett* 2005; 379:96-100
  72. Ma D, Hossain M, Pettet GK, Luo Y, Lim T, Akimov S, Sanders RD, Franks NP, Maze M: Xenon preconditioning reduces brain damage from neonatal asphyxia in rats. *J Cereb Blood Flow Metab* 2006; 26:199-208
  73. Ma D, Lim T, Xu J, Tang H, Wan Y, Zhao H, Hossain M, Maxwell PH, Maze M: Xenon preconditioning protects against renal ischemic-reperfusion injury *via* HIF-1alpha activation. *J Am Soc Nephrol* 2009; 20:713-20
  74. Li QF, Zhu YS, Jiang H: Isoflurane preconditioning activates HIF-1alpha, iNOS and Erk1/2 and protects against oxygen-glucose deprivation neuronal injury. *Brain Res* 2008; 1245:26-35
  75. Bantel C, Maze M, Trapp S: Neuronal preconditioning by inhalational anesthetics: Evidence for the role of plasmalemmal adenosine triphosphate-sensitive potassium channels. *ANESTHESIOLOGY* 2009; 110:986-95
  76. Miao B, Yin XH, Pei DS, Zhang QG, Zhang GY: Neuroprotective effects of preconditioning ischemia on ischemic brain injury through down-regulating activation of JNK1/2 *via* N-methyl-D-aspartate receptor-mediated Akt1 activation. *J Biol Chem* 2005; 280:21693-9
  77. Zhao P, Zuo Z: Isoflurane preconditioning induces neuroprotection that is inducible nitric oxide synthase-dependent in neonatal rats. *ANESTHESIOLOGY* 2004; 101:695-703
  78. Luo Y, Ma D, Jeong E, Sanders RD, Yu B, Hossain M, Maze M: Xenon and sevoflurane protect against brain injury in a neonatal asphyxia model. *ANESTHESIOLOGY* 2008; 109:782-9
  79. Yeo ST, Holdcroft A, Yentis SM, Stewart A, Bassett P: Analgesia with sevoflurane during labour: II. Sevoflurane compared with Entonox for labour analgesia. *Br J Anaesth* 2007; 98:110-5
  80. Rouse DJ, Hirtz DG, Thom E, Varner MW, Spong CY, Mercer BM, Iams JD, Wapner RJ, Sorokin Y, Alexander JM, Harper M, Thorp JM Jr, Ramin SM, Malone FD, Carpenter M, Miodovnik M, Moawad A, O'Sullivan MJ, Peaceman AM, Hankins GD, Langer O, Caritis SN, Roberts JM: A randomized, controlled trial of magnesium sulfate for the prevention of cerebral palsy. *N Engl J Med* 2008; 359:895-905
  81. Doyle LW, Crowther CA, Middleton P, Marret S, Rouse D: Magnesium sulphate for women at risk of preterm birth for neuroprotection of the fetus. *Cochrane Database Syst Rev* 2009; CD004661
  82. Greenwood K, Cox P, Mehmet H, Penrice J, Amess PN, Cady EB, Wyatt JS, Edwards AD: Magnesium sulfate treatment after transient hypoxia-ischemia in the newborn piglet does not protect against cerebral damage. *Pediatr Res* 2000; 48:346-50
  83. Groenendaal F, Rademaker CM, Toet MC, de Vries LS: Effects of magnesium sulphate on amplitude-integrated continuous EEG in asphyxiated term neonates. *Acta Paediatr* 2002; 91:1073-7
  84. Dribben WH, Creeley CE, Wang HH, Smith DJ, Farber NB, Olney JW: High dose magnesium sulfate exposure induces apoptotic cell death in the developing neonatal mouse brain. *Neonatology* 2009; 96:23-32
  85. Eicher DJ, Wagner CL, Katikaneni LP, Hulsey TC, Bass WT, Kaufman DA, Horgan MJ, Languani S, Bhatia JJ, Givelichian LM, Sankaran K, Yager JY: Moderate hypothermia in neonatal encephalopathy: Efficacy outcomes. *Pediatr Neurol* 2005; 32:11-7
  86. Shankaran S, Laptook AR, Ehrenkranz RA, Tyson JE, McDonald SA, Donovan EF, Fanaroff AA, Poole WK, Wright LL, Higgins RD, Finer NN, Carlo WA, Duara S, Oh W, Cotten CM, Stevenson DK, Stoll BJ, Lemons JA, Guillet R, Jobe AH; National Institute of Child Health and Human Development Neonatal Research Network: Whole-body hypothermia for neonates with hypoxic-ischemic encephalopathy. *N Engl J Med* 2005; 353:1574-84
  87. Westin B, Miller JA, Nyberg R, Wedenberg E: Neonatal asphyxia pallida treated with hypothermia alone or with hypothermia and transfusion of oxygenated blood. *Surgery* 1959; 45:868-79
  88. Cordey R: Hypothermia in resuscitating newborns in

- white asphyxia: A report of 14 cases. *Obstet Gynecol* 1964; 24:760-7
89. Silverman WA, Fertig JW, Berger AP: The influence of the thermal environment upon the survival of newly born premature infants. *Pediatrics* 1958; 22:876-86
  90. Busto R, Dietrich WD, Globus MY, Ginsberg MD: Post-ischemic moderate hypothermia inhibits CA1 hippocampal ischemic neuronal injury. *Neurosci Lett* 1989; 101:299-304
  91. Thoresen M, Penrice J, Lorek A, Cady EB, Wylezinska M, Kirkbride V, Cooper CE, Brown GC, Edwards AD, Wyatt JS, Reynolds EO: Mild hypothermia after severe transient hypoxia-ischemia ameliorates delayed cerebral energy failure in the newborn piglet. *Pediatr Res* 1995; 37:667-70
  92. Jacobs S, Hunt R, Tarnow-Mordi W, Inder T, Davis P: Cooling for newborns with hypoxic ischaemic encephalopathy. *Cochrane Database Syst Rev* 2007;CD003311
  93. Kapetanakis A, Azzopardi D, Wyatt J, Robertson NJ: Therapeutic hypothermia for neonatal encephalopathy: A UK survey of opinion, practice and neuro-investigation at the end of 2007. *Acta Paediatr* 2009; 98:631-5
  94. Rutherford MA, Azzopardi D, Whitelaw A, Cowan F, Renowden S, Edwards AD, Thoresen M: Mild hypothermia and the distribution of cerebral lesions in neonates with hypoxic-ischemic encephalopathy. *Pediatrics* 2005; 116:1001-6
  95. Rutherford M, Ramenghi LA, Edwards AD, Brocklehurst P, Halliday H, Levene M, Strohm B, Thoresen M, Whitelaw A, Azzopardi D: Assessment of brain tissue injury after moderate hypothermia in neonates with hypoxic-ischaemic encephalopathy: A nested substudy of a randomised controlled trial. *Lancet Neurol* 2010; 9:39-45
  96. Thoresen M, Satas S, Puka-Sundvall M, Whitelaw A, Hallström A, Löberg EM, Ungerstedt U, Steen PA, Hagberg H: Post-hypoxic hypothermia reduces cerebrocortical release of NO and excitotoxins. *Neuroreport* 1997; 8:3359-62
  97. Zeevalk GD, Nicklas WJ: Hypothermia, metabolic stress, and NMDA-mediated excitotoxicity. *J Neurochem* 1993; 61:1445-53
  98. Kil HY, Zhang J, Piantadosi CA: Brain temperature alters hydroxyl radical production during cerebral ischemia/reperfusion in rats. *J Cereb Blood Flow Metab* 1996; 16:100-6
  99. Iwata O, Thornton JS, Sellwood MW, Iwata S, Sakata Y, Noone MA, O'Brien FE, Bainbridge A, De Vita E, Raivich G, Peebles D, Scaravilli F, Cady EB, Ordidge R, Wyatt JS, Robertson NJ: Depth of delayed cooling alters neuroprotection pattern after hypoxia-ischemia. *Ann Neurol* 2005; 58:75-87
  100. Thoresen M, Satas S, Löberg EM, Whitelaw A, Acolet D, Lindgren C, Penrice J, Robertson N, Haug E, Steen P: Twenty-four hours of mild hypothermia in unsedated newborn pigs starting after a severe global hypoxic-ischemic insult is not neuroprotective. *Pediatr Res* 2001; 50:405-11
  101. Westermaier T, Zausinger S, Baethmann A, Steiger HJ, Schmid-Elsaesser R: No additional neuroprotection provided by barbiturate-induced burst suppression under mild hypothermic conditions in rats subjected to reversible focal ischemia. *J Neurosurg* 2000; 93:835-44
  102. Jatana M, Singh I, Singh AK, Jenkins D: Combination of systemic hypothermia and N-acetylcysteine attenuates hypoxic-ischemic brain injury in neonatal rats. *Pediatr Res* 2006; 59:684-9
  103. Levene M: Minimising neonatal brain injury: How research in the past five years has changed my clinical practice. *Arch Dis Child* 2007; 92:261-5
  104. Fritz KI, Ashraf QM, Mishra OP, Delivoria-Papadopoulos M: Effect of moderate hypocapnic ventilation on nuclear DNA fragmentation and energy metabolism in the cerebral cortex of newborn piglets. *Pediatr Res* 2001; 50:586-9
  105. Victor S, Appleton RE, Beirne M, Marson AG, Weindling AM: Effect of carbon dioxide on background cerebral electrical activity and fractional oxygen extraction in very low birth weight infants just after birth. *Pediatr Res* 2005; 58:579-85
  106. Vannucci RC, Brucklacher RM, Vannucci SJ: Effect of carbon dioxide on cerebral metabolism during hypoxia-ischemia in the immature rat. *Pediatr Res* 1997; 42:24-9
  107. Robertson NJ, Bhakoo K, Puri BK, Edwards AD, Cox IJ: Hypothermia and amiloride preserve energetics in a neonatal brain slice model. *Pediatr Res* 2005; 58:288-96
  108. Kofke WA, Garman RH, Garman R, Rose ME: Opioid neurotoxicity: Fentanyl-induced exacerbation of cerebral ischemia in rats. *Brain Res* 1999; 818:326-34
  109. Clark WM, Raps EC, Tong DC, Kelly RE, The Cervene Stroke Study Investigators: Cervene (Nalmefene) in acute ischemic stroke: Final results of a phase III efficacy study. *Stroke* 2000; 31:1234-9
  110. Anand KJ, Barton BA, McIntosh N, Lagercrantz H, Pelausa E, Young TE, Vasa R: Analgesia and sedation in preterm neonates who require ventilatory support: Results from the NOPAIN trial. *Neonatal Outcome and Prolonged Analgesia in Neonates. Arch Pediatr Adolesc Med* 1999; 153:331-8
  111. Muijsce DJ, Towfighi J, Stern D, Vannucci RC: Mannitol therapy in perinatal hypoxic-ischemic brain damage in rats. *Stroke* 1990; 21:1210-4
  112. Levene MI, Evans D: Medical management of raised intracranial pressure after severe birth asphyxia. *Arch Dis Child* 1985; 60:12-6
  113. Wirrell EC, Armstrong EA, Osman LD, Yager JY: Prolonged seizures exacerbate perinatal hypoxic-ischemic brain damage. *Pediatr Res* 2001; 50:445-54
  114. Miller SP, Weiss J, Barnwell A, Ferriero DM, Latal-Hajnal B, Ferrer-Rogers A, Newton N, Partridge JC, Glidden DV, Vigneron DB, Barkovich AJ: Seizure-associated brain injury in term newborns with perinatal asphyxia. *Neurology* 2002; 58:542-8
  115. Glass HC, Glidden D, Jeremy RJ, Barkovich AJ, Ferriero DM, Miller SP: Clinical neonatal seizures are independently associated with outcome in infants at risk for hypoxic-ischemic brain injury. *J Pediatr* 2009; 155:318-23
  116. Hall RT, Hall FK, Daily DK: High-dose phenobarbital therapy in term newborn infants with severe perinatal asphyxia: A randomized, prospective study with three-year follow-up. *J Pediatr* 1998; 132:345-8
  117. Goldberg RN, Moscoso P, Bauer CR, Bloom FL, Curless RG, Burke B, Bancalari E: Use of barbiturate therapy in severe perinatal asphyxia: A randomized controlled trial. *J Pediatr* 1986; 109:851-6
  118. Ruth V, Virkola K, Paetau R, Raivio KO: Early high-dose phenobarbital treatment for prevention of hypoxic-ischemic brain damage in very low birth weight infants. *J Pediatr* 1988; 112:81-6
  119. Follett PL, Deng W, Dai W, Talos DM, Massillon LJ, Rosenberg PA, Volpe JJ, Jensen FE: Glutamate receptor-mediated oligodendrocyte toxicity in periventricular leukomalacia: A protective role for topiramate. *J Neurosci* 2004; 24:4412-20
  120. Glier C, Dzielko M, Bittigau P, Jarosz B, Korobowicz E, Ikonomidou C: Therapeutic doses of topiramate are not toxic to the developing rat brain. *Exp Neurol* 2004; 187:403-9
  121. Schubert S, Brandl U, Brodhun M, Ulrich C, Spaltmann J, Fiedler N, Bauer R: Neuroprotective effects of topiramate after hypoxia-ischemia in newborn piglets. *Brain Res* 2005; 1058:129-23
  122. Silverstein FS, Jensen FE, Inder T, Hellstrom-Westas L,



- Hirtz D, Ferriero DM: Improving the treatment of neonatal seizures: National Institute of Neurological Disorders and Stroke workshop report. *J Pediatr* 2008; 153:12-5
123. Laudenbach V, Mantz J, Lagercrantz H, Desmonts JM, Evrard P, Gressens P: Effects of  $\alpha_2$ -adrenoceptor agonists on perinatal excitotoxic brain injury: Comparison of clonidine and dexmedetomidine. *ANESTHESIOLOGY* 2002; 96:134-41
  124. Dean JM, George S, Naylor AS, Mallard C, Gunn AJ, Bennet L: Partial neuroprotection with low-dose infusion of the  $\alpha_2$ -adrenergic receptor agonist clonidine after severe hypoxia in preterm fetal sheep. *Neuropharmacology* 2008; 55:166-74
  125. Ma D, Hossain M, Rajakumaraswamy N, Arshad M, Sanders RD, Franks NP, Maze M: Dexmedetomidine produces its neuroprotective effect *via* the  $\alpha_{2A}$ -adrenoceptor subtype. *Eur J Pharmacol* 2004; 502:87-97
  126. Rajakumaraswamy N, Ma D, Hossain M, Sanders RD, Franks NP, Maze M: Neuroprotective interaction produced by xenon and dexmedetomidine on *in vitro* and *in vivo* neuronal injury models. *Neurosci Lett* 2006; 409:128-33
  127. Guerguerian AM, Brambrink AM, Traystman RJ, Haganir RL, Martin LJ: Altered expression and phosphorylation of *N*-methyl-D-aspartate receptors in piglet striatum after hypoxia-ischemia. *Brain Res Mol Brain Res* 2002; 104:66-80
  128. Robinson S, Li Q, Dechant A, Cohen ML: Neonatal loss of gamma-aminobutyric acid pathway expression after human perinatal brain injury. *J Neurosurg* 2006; 104:396-408
  129. Puka-Sundvall M, Hallin U, Zhu C, Wang X, Karlsson JO, Blomgren K, Hagberg H: NMDA blockade attenuates caspase-3 activation and DNA fragmentation after neonatal hypoxia-ischemia. *Neuroreport* 2000; 11:2833-6
  130. Ikonomidou C, Mosinger JL, Olney JW: Hypothermia enhances protective effect of MK-801 against hypoxic/ischemic brain damage in infant rats. *Brain Res* 1989; 487:184-7
  131. Alkan T, Kahveci N, Buyukuysal L, Korfali E, Ozluk K: Neuroprotective effects of MK 801 and hypothermia used alone and in combination in hypoxic-ischemic brain injury in neonatal rats. *Arch Physiol Biochem* 2001; 109:135-44
  132. Sanders RD, Ma D, Maze M: Anaesthesia induced neuroprotection. *Best Pract Res Clin Anaesthesiol* 2005; 19:461-74
  133. Ma D, Williamson P, Januszewski A, Nogaro MC, Hossain M, Ong LP, Shu Y, Franks NP, Maze M: Xenon mitigates isoflurane-induced neurodegeneration in the developing rodent brain. *ANESTHESIOLOGY* 2007; 10:746-53
  134. Martin JL, Ma D, Hossain M, Xu J, Sanders RD, Franks NP, Maze M: Asynchronous administration of xenon and hypothermia significantly reduces brain infarction in the neonatal rat. *Br J Anaesth* 2007; 98:236-40
  135. O'Brien FE, Iwata O, Thornton JS, De Vita E, Sellwood MW, Iwata S, Sakata YS, Charman S, Ordridge R, Cady EB, Wyatt JS, Robertson NJ: Delayed whole-body cooling to 33 or 35 degrees C and the development of impaired energy generation consequential to transient cerebral hypoxia-ischemia in the newborn piglet. *Pediatrics* 2006; 117:1549-59
  136. Faulkner SD, Kapetanakis A, Bainbridge A, Kato T, DeVita E, Evans S, Cady E, Raivich G, Scaravilli F, Robertson NJ: Neuroprotective effects of xenon, hypothermia, and combined xenon and hypothermia after transient cerebral hypoxia-ischemia in the newborn piglet. *E-PAS* 2009; 3:2160
  137. Sirén AL, Fratelli M, Brines M, Goemans C, Casagrande S, Lewczuk P, Keenan S, Gleiter C, Pasquali C, Capobianco A, Mennini T, Heumann R, Cerami A, Ehrenreich H, Ghezzi P: Erythropoietin prevents neuronal apoptosis after cerebral ischemia and metabolic stress. *Proc Natl Acad Sci U S A* 2001; 98:4044-9
  138. Spandou E, Papadopoulou Z, Soubasi V, Karkavelas G, Simeonidou C, Pazaiti A, Guiba-Tziampiri O: Erythropoietin prevents long-term sensorimotor deficits and brain injury following neonatal hypoxia-ischemia in rats. *Brain Res* 2005; 1045:22-30
  139. Demers EJ, McPherson RJ, Juul SE: Erythropoietin protects dopaminergic neurons and improves neurobehavioral outcomes in juvenile rats after neonatal hypoxia-ischemia. *Pediatr Res* 2005; 58:297-301
  140. Ruth V, Autti-Ramo I, Granstrom ML, Korkman M, Raivio KO: Prediction of perinatal brain damage by cord plasma vasopressin, erythropoietin, and hypoxanthine values. *J Pediatr* 1988; 113:880-5
  141. Juul SE, McPherson RJ, Farrell FX, Jolliffe L, Ness DJ, Gleason CA: Erythropoietin concentrations in cerebrospinal fluid of nonhuman primates and fetal sheep following high-dose recombinant erythropoietin. *Biol Neonate* 2004; 85:138-44
  142. Zhu C, Kang W, Xu F, Cheng X, Zhang Z, Jia L, Ji L, Guo X, Xiong H, Simbruner G, Blomgren K, Wang X: Erythropoietin improved neurologic outcomes in newborns with hypoxic-ischemic encephalopathy. *Pediatrics* 2009; 124:218-26
  143. Nijima S, Shortland DB, Levene MI, Evans DH: Transient hyperoxia and cerebral blood flow velocity in infants born prematurely and at full term. *Arch Dis Child* 1988; 63:1126-30
  144. Felderhoff-Mueser U, Bittigau P, Siffringer M, Jarosz B, Korobowicz E, Mahler L, Piening T, Moysich A, Grune T, Thor F, Heumann R, Bührer C, Ikonomidou C: Oxygen causes cell death in the developing brain. *Neurobiol Dis* 2004; 17:273-82
  145. Tan A, Schulze A, O'Donnell CP, Davis PG: Air *versus* oxygen for resuscitation of infants at birth. *Cochrane Database Syst Rev* 2005; 18:CD002273
  146. Rabi Y, Rabi D, Yee W: Room air resuscitation of the depressed newborn: A systematic review and meta-analysis. *Resuscitation* 2007; 72:353-63
  147. Saugstad OD, Ramji S, Soll RF, Vento M: Resuscitation of newborn infants with 21% or 100% oxygen: An updated systematic review and meta-analysis. *Neonatology* 2008; 94:176-82
  148. Karasawa F, Takita A, Fukuda I, Kawatani Y: Nitrous oxide concentrations in maternal and fetal blood during caesarean section. *Eur J Anaesthesiol* 2003; 20:555-9
  149. Peeters-Scholte C, Braun K, Koster J, Kops N, Blomgren K, Buonocore G, van Buul-Offers S, Hagberg H, Nicolay K, van Bel F, Groenendaal F: Effects of allopurinol and deferoxamine on reperfusion injury of the brain in newborn piglets after neonatal hypoxia-ischemia. *Pediatr Res* 2003; 54:516-22
  150. Palmer C, Towfighi J, Roberts RL, Heitjan DF: Allopurinol administered after inducing hypoxia-ischemia reduces brain injury in 7-day-old rats. *Pediatr Res* 1993; 33:405-11
  151. Van Bel F, Shadid M, Moisson RM, Dorrepaal CA, Fontijn J, Monteiro L, Van De Bor M, Berger HM: Effect of allopurinol on postasphyxial free radical formation, cerebral hemodynamics, and electrical brain activity. *Pediatrics* 1998; 101:185-93
  152. Benders MJ, Bos AF, Rademaker CM, Rijken M, Torrance HL, Groenendaal F, van Bel F: Early postnatal allopurinol does not improve short term outcome after severe birth asphyxia. *Arch Dis Child Fetal Neonatal Ed* 2006; 91:F163-5
  153. Torrance HL, Benders MJ, Derks JB, Rademaker CM, Bos AF, Van Den Berg P, Longini M, Buonocore G, Venegas M, Baquero H, Visser GH, Van Bel F: Maternal allopurinol



- during fetal hypoxia lowers cord blood levels of the brain injury marker S-100B. *Pediatrics* 2009; 124:350-7
154. Pei Z, Cheung RT: Pretreatment with melatonin exerts anti-inflammatory effects against ischemia/reperfusion injury in a rat middle cerebral artery occlusion stroke model. *J Pineal Res* 2004; 37:85-91
  155. Pei Z, Pang SF, Cheung RT: Administration of melatonin after onset of ischemia reduces the volume of cerebral infarction in a rat middle cerebral artery occlusion stroke model. *Stroke* 2003; 4:770-5
  156. Hung YC, Chen TY, Lee EJ, Chen WL, Huang SY, Lee WT, Lee MY, Chen HY, Wu TS: Melatonin decreases matrix metalloproteinase-9 activation and expression and attenuates reperfusion-induced hemorrhage following transient focal cerebral ischemia in rats. *J Pineal Res* 2008; 45:459-67
  157. Husson I, Mesplès B, Bac P, Vamecq J, Evrard P, Gressens P: Melatonergic neuroprotection of the murine periventricular white matter against neonatal excitotoxic challenge. *Ann Neurol* 2002; 51:82-92
  158. Wang X, Svedin P, Nie C, Lapatto R, Zhu C, Gustavsson M, Sandberg M, Karlsson JO, Romero R, Hagberg H, Mallard C: *N*-Acetylcysteine reduces lipopolysaccharide-sensitized hypoxic-ischemic brain injury. *Ann Neurol* 2007; 61:263-71
  159. Stolp HB, Dziegielewska KM, Ek CJ, Potter AM, Saunders NR: Long-term changes in blood-brain barrier permeability and white matter following prolonged systemic inflammation in early development in the rat. *Eur J Neurosci* 2005; 22:2805-16
  160. Yang D, Nemkul N, Shereen A, Jone A, Dunn RS, Lawrence DA, Lindquist D, Kuan CY: Therapeutic administration of plasminogen activator inhibitor-1 prevents hypoxic-ischemic brain injury in newborns. *J Neurosci* 2009; 29:8669-74
  161. Liu XH, Kwon D, Schielke GP, Yang GY, Silverstein FS, Barks JD: Mice deficient in interleukin-1 converting enzyme are resistant to neonatal hypoxic-ischemic brain damage. *J Cereb Blood Flow Metab* 1999; 19:1099-108
  162. Hedtjörn M, Leverin AL, Eriksson K, Blomgren K, Mallard C, Hagberg H: Interleukin-18 involvement in hypoxic-ischemic brain injury. *J Neurosci* 2002; 22:5910-9
  163. Hagberg H, Gilland E, Bona E, Hanson LA, Hahin-Zoric M, Blennow M, Holst M, McRae A, Söder O: Enhanced expression of interleukin (IL)-1 and IL-6 messenger RNA and bioactive protein after hypoxia-ischemia in neonatal rats. *Pediatr Res* 1996; 40:603-9
